# Supplementary material for: Development and validation of an in-hospital major adverse cardiovascular events risk model for young patients with acute coronary syndrome: a retrospective cohort study
Source: PeerJ journal article supplement (doi:10.7717/peerj.19513), 2025-05-26
Supplement: dataset.xls [file dataset.xls]

## Sheet: Sheet1
id	sex	age	sbp	dbp	hr	smoke	history	hypertension	dm	diagnosis	killip	res.ef	res.mace	neu	wbc	lym	nlr	n.lesions	gensini	hstni	ckmb	ua	bun	scr	bg	tg	ldl	hdl	tc	ef
1	1	41	132	80	89	1	0	1	0	1	1	0	0	54.7	10.26	3.99	13.7093	1	32	8.7	1.4	513.6	4.8	87	4.65	5.7	3.66	0.69	5.98	45
2	1	41	130	76	102	1	1	0	1	1	1	1	0	30.17	35.75	3.13	9.63898	3	62	19.7	2	292.8	3.4	68	6.03	1.32	4.38	0.84	5.71	50
3	1	40	132	86	97	1	0	0	0	2	4	0	1	25.51	29.55	2.33	10.9485	3	59	89.5	3.8	285.8	6.12	71	4.63	1.91	3.43	0.78	4.89	60
4	1	36	120	70	75	1	1	0	0	1	1	0	0	21.03	23.47	1.55	13.5677	2	56	229.5	7	422.8	3.57	101	5.94	3.89	4.73	0.85	6.96	60
5	1	44	148	85	99	1	0	1	0	1	2	1	1	20.21	22.99	1.79	11.2905	2	54	129.7	0.8	387	4.59	67	3.92	2	3.05	0.65	4	60
6	1	30	165	90	139	1	0	1	1	1	1	0	0	18.91	21.88	2.6	7.27308	3	54	36.7	1.1	163	3.26	50	11.48	2.62	3.14	0.87	4.5	60
7	1	28	145	88	92	1	0	0	0	1	1	0	1	18.73	21.32	1.44	13.0069	2	86	585.2	4.4	220.7	3.85	63	5.66	1.48	2.52	0.69	3.57	58
8	1	35	131	96	113	1	0	1	0	1	1	1	1	18.36	21.38	2.18	8.42202	3	164	14347.4	78	335.6	4.92	66	5.59	2.67	2.6	1.01	6.28	60
9	1	38	149	99	87	1	0	1	1	1	1	0	0	18.35	20.57	1.54	11.9156	3	34	422.6	1.4	405.2	5.5	78	18.34	3.28	1.8	0.72	2.9	57
10	1	44	67	42	98	1	0	0	0	1	1	1	1	17.61	21.18	2.49	7.07229	2	160	1063.6	12.2	295.9	4.13	35	15	12.38	1.32	0.7	6.43	55
11	1	43	122	87	67	1	0	0	0	1	1	0	0	17.43	19.92	1.44	12.1042	3	44	859.1	40.9	224.6	4.35	64	6.77	0.88	3.36	1.38	4.98	42
12	1	37	109	89	88	1	0	0	0	1	1	1	0	17.18	19.17	1	17.18	2	56	26.9	1.3	477.6	8.43	154	5.95	3.02	3.97	0.96	5.62	44
13	1	34	109	89	88	1	0	0	0	1	1	1	0	17.18	19.17	1	17.18	2	56	5.3	2.3	324.9	4.65	79	5.79	1.59	1.67	0.94	3.14	60
14	1	39	90	42	80	1	0	0	0	2	4	0	1	16.85	17.96	0.94	17.9255	3	168	0.01	1.4	471.4	5.35	97	5.88	1.17	3.45	1.03	4.85	58
15	1	36	90	42	80	1	0	0	0	1	4	0	1	16.85	17.96	0.94	17.9255	3	168	0.02	1.8	478.5	6.21	83	20.04	17.01	1.34	0.49	5.09	54
16	1	43	132	99	71	0	0	0	0	2	1	0	0	16.17	18.15	1.39	11.6331	3	128	5.44	155.4	314.5	3.75	50	6.33	1.56	2.55	1.16	4.2	40
17	1	37	170	70	73	1	0	1	0	1	1	1	0	15.96	19.86	2.92	5.46575	1	82	2.64	26.7	412.5	4.61	79	3.54	1.35	2.73	0.84	4	60
18	1	32	89	65	159	1	0	0	0	1	4	0	1	15.78	25.48	8.26	1.91041	1	26	6.99	243.9	254.4	3.79	58	6.99	2.22	3.54	0.84	4.96	57
19	1	27	130	95	71	1	0	0	0	1	1	0	1	15.74	18.23	1.57	10.0255	1	48	0.03	1.6	405	5.42	89	19.07	3.01	4.43	1.01	6.18	60
20	1	44	122	90	86	1	0	0	0	1	1	0	0	15.43	17.29	1.31	11.7786	2	44	3.44	51.2	493.9	4.11	69	12.11	2.06	5.21	1.44	7.35	40
21	1	38	135	99	101	1	0	1	0	1	1	1	0	15.36	18.03	1.84	8.34783	3	90	0.39	10.7	299.5	10.7	71	11.83	4.84	3.07	0.94	5.4	60
22	1	38	147	117	100	1	0	1	0	1	1	0	0	14.99	18.04	0.77	19.4675	1	40	0.13	4.7	471.6	5.82	101	5.03	1.42	2.62	0.82	4.01	50
23	1	35	105	75	69	1	0	0	0	1	1	0	0	14.91	18.86	2.87	5.19512	3	40	0.8	25.4	303.1	5.88	78	5.11	0.6	2.39	1.31	3.89	60
24	1	42	102	70	59	1	0	1	0	1	1	0	0	14.03	18.24	3.1	4.52581	1	32	0.24	22.2	323.2	3.33	64	6.95	1.84	2.97	0.97	4.35	60
25	1	35	120	78	93	1	0	1	0	1	1	1	1	13.97	16.78	2.11	6.62085	3	60	0.01	1	410.1	6.1	97	6.83	1.22	2.53	0.97	3.73	60
26	1	45	104	74	84	1	0	0	0	1	1	0	0	13.89	15.62	0.84	16.5357	3	37	0.01	1	303.8	4.03	61	10.39	3.44	2.55	1.17	3.98	57
27	1	33	123	91	98	1	0	0	1	1	1	0	0	13.79	15.82	1.58	8.72785	3	48	0.01	1	254.4	2.39	40	5.11	1.41	3.71	1	4.82	60
28	2	36	87	70	117	1	0	0	0	1	4	1	1	13.74	15.8	1.34	10.2537	2	162	1.44	21.3	354	4.81	67	5.23	1.2	3.01	1.04	4.11	60
29	1	46	105	54	88	1	0	0	0	1	1	0	1	13.23	21.32	6.26	2.11342	1	21	0.73	35.3	380	5.91	84		0.95	3.56	1.65	5.38	60
30	1	44	104	72	75	0	0	0	1	1	1	0	0	13.15	14.72	1.03	12.767	3	81	1.26	5.3	310.2	5.43	64	20.91	9.23	2.09	0.7	11.88	60
31	1	36	163	88	92	1	0	0	0	1	1	0	1	12.93	14.66	1.33	9.7218	1	80	0.01	1	478.6	3.55	72	7.19	1.21	2.66	0.88	3.71	62
32	1	43	100	78	69	1	0	0	0	1	1	1	0	12.89	18.5	4.22	3.0545	3	104	78	302	465.9	3.13	76	6.15	0.71	4.01	1.12	5.22	44
33	1	45	140	100	70	1	1	0	0	1	1	0	0	12.69	14.53	1.36	9.33088	3	114	0.21	9.5	422.6	4.58	62		1.19	4.01	1.09	5.58	40
34	1	44	118	78	80	1	0	0	0	1	1	0	0	12.47	15.84	2.66	4.68797	1	32	0.02	2.2	379.2	4.55	85	10.05	2.05	4	1.02	5.41	60
35	1	40	141	102	112	1	0	1	1	1	2	1	1	12.46	14.45	1.28	9.73438	2	88	0.01	1	453.3	6.65	74	8.26	2.91	3.22	1.04	4.85	45
36	1	38	163	107	80	1	0	0	0	1	1	1	1	12.37	15.03	2.01	6.15423	2	68	0.01	0.9	503.3	5.46	104	5.85	2.8	3.71	1.02	5.22	58
37	1	38	163	107	80	1	0	0	0	1	1	1	1	12.37	15.03	2.01	6.15423	3	69	0.03	0.8	519.3	4.82	77	5.36	4.46	2.47	0.82	4.14	60
38	1	26	138	65	68	0	0	0	0	1	1	1	1	12.33	16.15	3.01	4.09635	1	80	0.01	0.7	255.4	3.18	81	17.73	10.53	2.38	0.66	5.39	57
39	1	43	65	47	48	0	0	0	1	1	4		1	12.31	16.78	3.89	3.16452	3	152	0.27	3	538	3.9	79	6.68	6.38	2.49	1.21	5.29	60
40	1	39	117	79	120	1	1	0	1	2	2	1	1	12.11	15.63	2.27	5.3348	3	130	0.17	4.8	246.7	7.29	91	15.46	4.75	3.67	1.02	5.88	36
41	1	41	130	69	75	1	0	1	1	1	1	0	0	12.07	14.82	1.58	7.63924	2	20	1.19	2.8	237.2	6.02	77	11.84	0.78	2.08	1.41	3.67	60
42	1	36	127	82	78	0	0	0	0	1	1	0	0	11.91	14.58	2.06	5.78155	3	40	0.03	1	567.9	5.06	78	6.27	2.61	4.26	0.88	5.79	60
43	1	45	80	50	90	1	0	0	0	1	4	1	1	11.83	14.58	1.92	6.16146	1	19	0.01	2.2	457.7	6.32	93	4.4	1.99	2.35	1.06	4.01	60
44	1	40	159	106	65	0	0	0	0	1	1	0	0	11.74	14.62	1.8	6.52222	1	51	0.01	2.1	468.6	5.96	89	5.39	1.69	4.02	0.9	5.33	59
45	1	39	154	100	100	0	0	0	1	1	1	0	0	11.71	13.85	1.45	8.07586	2	40	1.88	8.3	347.3	2.75	70		4.09	4.14	0.82	5.89	57
46	1	32	118	80	96	1	0	0	0	3	1	0	0	11.71	13.21	0.96	12.1979	1	8	0.02	1	374.8	5.08	104	5.12	2.42	3.04	0.87	4.44	60
47	1	45	160	97	70	1	0	1	0	1	2	1	1	11.55	14.08	1.59	7.26415	1	80	1.21	56.9	440.9	6.67	61	6.51	2.05	4.81	0.9	5.92	60
48	1	37	107	60	75	1	0	0	0	1	1	0	0	11.49	14.12	2.09	5.49761	1	2	2.08	34.1	324	5.48	89	5.26	1.26	2.39	1.01	3.59	60
49	1	42	130	90	66	1	1	0	0	1	1	0	1	11.45	13.71	1.37	8.35766	1	80	0.01	0.7	310.5	6.11	117	7.23	1.5	2.79	0.94	3.87	48
50	1	42	130	90	66	1	1	0	0	1	1	0	0	11.45	13.71	1.37	8.35766	3	80	0.03	3	493.6	6.84	111	34.09	2.51	3.01	0.75	4.08	60
51	1	42	107	83	80	0	0	0	1	1	1	0	0	11.32	12.8	1.23	9.20325	3	36	0.01	1.8	549.7	6.53	100	9.23	2.5	3.95	1	5.57	39
52	1	31	138	92	94	1	0	0	0	1	1	0	0	11.17	16.45	4.08	2.73775	2	64	0.62	19.4	358.7	6.84	81	19.58	4.18	4.55	0.97	6.81	57
53	1	36	106	73	79	0	1	1	0	1	1	0	0	11.13	13.32	0.97	11.4742	2	36	0.02	1.2	376.9	6.91	77	15.39	16.15	1.79	0.61	7.19	60
54	1	29	170	105	104	0	0	0	0	1	1	1	1	11.11	13.31	1.76	6.3125	2	33	0.91	35.7	616.2	5.23	88	4.51	2.25	2.88	1.02	4.38	60
55	1	37	140	92	88	0	0	0	0	1	1	0	0	11.09	13.11	1.37	8.09489	3	42	78	304	334.8	4.02	64	14.49	6.81	3.53	0.85	5.74	60
56	1	33	120	80	48	1	0	1	1	1	1	0	1	10.98	16.62	4.55	2.41319	1	32	4.8	92.8	417.9	4.5	86	6.99	5	4.98	1.04	7.7	59
57	1	41	114	65	65	0	0	1	0	1	1	0	0	10.9	15.28	3.37	3.23442	3	80	0.26	2.7	460.2	5.44	91	5.4	2.04	4.07	0.92	5.72	59
58	1	28	146	85	76	1	0	1	0	2	1	0	0	10.84	12.2	0.82	13.2195	1	2	0.59	18	271.3	4.77	56	7.82	0.94	3.51	1.15	4.87	50
59	1	28	146	85	76	0	0	1	0	2	1	0	0	10.84	12.2	0.82	13.2195	1	1	0.17	10.1	328.8	5.22	58	9.78	2.59	3.04	0.73	4.46	60
60	1	41	154	86	70	1	0	0	1	1	1	0	0	10.8	15.48	3.92	2.7551	2	85	0.44	17.4	301.4	4.08	83	5.35	1.29	3	1	4.03	53
61	1	42	154	86	70	1	0	0	0	1	1	0	0	10.8	15.48	3.92	2.7551	2	85	0.09	1.4	350.3	6.23	77	6.99	3.95	3.22	0.79	4.53	58
62	2	38	160	76	79	0	0	0	1	2	1	0	0	10.79	14.05	2.3	4.6913	2	32	0.87	7.7	285.5	5.46	72	5.62	0.92	2.14	0.77	2.98	47
63	1	42	148	93	83	1	1	0	0	1	1	0	0	10.77	12.18	0.77	13.987	3	63	0.57	15.4	263.5	3.07	67	5.14	1.39	3.03	0.81	4.17	58
64	1	35	151	106	81	1	0	0	0	1	1	1	1	10.76	14.05	2.74	3.92701	1	80	0.24	8.5	368.1	3.36	67	9.66	2.32	3.17	0.7	4.23	42
65	1	32	127	71	61	1	0	0	0	1	1	0	0	10.69	13.23	1.87	5.71658	2	52	1.11	26.6	322.4	5.28	73	8.52	1.51	5.24	1	6.4	57
66	1	38	198	131	87	1	0	1	0	1	1	0	0	10.58	12.85	1.22	8.67213	1	11	0.52	19.8	304.1	5.62	63	5.02	0.54	3.05	1.4	5.05	42
67	1	37	92	55	76	1	0	1	0	1	1	0	0	10.58	12.44	1.37	7.72263	3	36	11.84	69.7	212.1	4.95	56	16.23	0.62	1.83	1.08	3.1	56
68	1	40	136	84	86	1	0	1	0	1	1	0	0	10.56	14.27	2.84	3.71831	3	56	0.05	1.6	292.2	6.1	73	4.54	1.99	3.27	1.12	4.54	55
69	1	36	92	60	72	1	0	0	0	1	1	0	0	10.55	13.14	1.85	5.7027	3	122	14.42	131.3	512.5	4.63	90	5.12	1.65	5.09	1.04	6.58	54
70	1	34	92	60	72	1	0	0	0	1	1	0	0	10.55	13.14	1.85	5.7027	3	118	2.08	11.2	493.9	4.49	91	4.57	2.77	3.04	0.92	4.56	58
71	1	39	119	62	87	1	0	0	0	1	2	1	0	10.51	11.69	0.83	12.6627	3	122	0.01	1.5	317.3	4.64	68	5.45	2.64	4.6	0.88	5.95	58
72	1	43	147	66	88	0	0	0	0	1	1	0	0	10.44	15.35	3.83	2.72585	1	80	0.03	1.4	291.8	6.8	81	4.21	5.77	3.69	0.9	5.32	53
73	1	41	133	96	81	1	0	0	0	2	1	0	0	10.43	13.08	1.85	5.63784	2	59	0.05	2.7	293.3	5.19	5.19	11.19	6.86	2.4	0.79	5.01	48
74	1	41	107	65	77	1	0	0	0	2	1	0	0	10.42	15.93	4.09	2.54768	2	46	0.01	0.5	337.3	4.11	73	5.37	1.53	3.08	1.32	4.46	60
75	1	44	118	87	56	1	0	0	0	1	1	0	0	10.38	12.74	1.54	6.74026	2	53	1.44	87.1	317.4	5.17	58	7.27	0.6	3.02	1.16	4.29	55
76	1	31	118	72	84	1	0	0	0	1	1	1	0	10.32	11.5	0.89	11.5955	1	48	0.35	2.8	463.7	5.39	91	5.14	2.51	3.91	0.69	4.91	60
77	1	21	144	81	80	0	1	0	0	1	1	0	0	10.32	13.26	2.39	4.31799	1	32	9.68	92.5	285.7	3.61	81	9.68	1.25	3.03	1.3	4.35	50
78	2	43	154	109	120	0	1	0	1	1	2	1	1	10.31	13.61	2.4	4.29583	3	88	0.62	41.3	435.5	3.71	71	6.1	1.55	2.98	0.76	3.89	60
79	1	41	119	86	70	1	0	0	0	1	1	0	0	10.3	12.51	1.83	5.62842	3	73	0.96	0.8	420.7	3.93	76	4.66	3.23	3.46	0.79	4.74	54
80	1	38	147	124	151	1	0	0	0	1	3	0	1	10.23	12.72	1.72	5.94767	3	41	0.2	5.7	283.3	5.78	65	5.87	4.44	4.49	0.73	6.14	60
81	1	40	188	134	68	0	0	0	0	2	1	0	0	10.22	16.42	4.61	2.21692	2	160	0.01	0.6	347.6	4.53	70	7.67	1.07	7.71	0.8	9.19	50
82	1	40	146	86	67	0	1	1	0	1	1	0	0	10.2	11.81	1.03	9.90291	3	92	0.01	1.8	197	5.19	79	6.27	3.99	3.1	0.73	5.05	58
83	1	39	109	71	80	1	0	0	0	1	1	0	0	10.13	12.95	2.05	4.94146	2	42	0.25	16.4	433.7	3.37	64	5.28	1.63	4.05	0.91	5.71	60
84	1	44	170	90	97	0	0	1	0	1	1	1	0	10.12	13.43	2.29	4.41921	2	87	0.08	1.8	362.1	5.19	73	11.14	14.36	3.66	0.95	8.01	55
85	1	32	122	82	54	1	1	0	0	2	1	0	0	10.1	11.67	1.12	9.01786	2	36	0.04	6.7	254.1	6.83	62	4.69	1.41	3.82	0.86	4.74	44
86	1	41	127	83	67	0	0	0	0	1	1	0	0	9.95	13.11	2.4	4.14583	3	40	0.03	1.8	304.2	6.39	105.09	9.1	2.42	2.4	0.86	3.92	60
87	1	40	126	74	69	0	0	1	0	1	1	0	0	9.95	11.48	1.17	8.50427	3	92	0.37	2.2	83	3.1	85.41	8.09	2.3	4.41	0.94	5.62	60
88	1	37	154	91	69	1	0	0	0	1	1	0	0	9.92	11.84	1.53	6.48366	2	39	2.23	24.6	337.9	4.92	81	5.35	6	2.67	0.58	4.72	60
89	1	25	89	65	64	1	0	0	0	2	1	1	0	9.91	12.33	1.88	5.27128	1	80	0.01	1	349.5	5.7	84.45	4.13	1.95	2.45	1.14	3.99	60
90	1	40	147	119	96	1	1	0	0	1	1	0	0	9.82	11.81	1.57	6.25478	3	135	0.01	1.7	542.7	4.65	113.46	5.52	4.48	4.91	0.99	6.49	55
91	1	39	140	85	106	1	0	1	0	2	2	0	1	9.81	12.33	1.63	6.0184	2	42	2.14	23.1	359.4	4.84	62.06	13.59	2.47	4	1.05	5.12	60
92	1	36	146	96	70	0	0	0	0	1	1	0	0	9.75	11.4	1.28	7.61719	1	32	0.37	5.8	450.5	3.17	96.93	3.9	1.48	3.69	1.02	4.85	58
93	1	36	93	66	85	1	0	1	0	1	1	1	0	9.72	11.56	1.42	6.84507	1	82	0.01	1.3	348.2	3.63	82.88	5.84	4.42	3.37	0.73	5.31	58
94	1	33	160	110	100	1	0	0	0	1	1	0	0	9.72	11.51	1.25	7.776	1	0	9.69	35.8	415.8	6.56	69.53	19.53	2.42	4.61	0.87	5.97	45
95	1	41	125	80	56	1	0	0	0	1	1	0	0	9.72	11.81	1.56	6.23077	3	69	0.18	11.3	276.7	3.33	55.78	5.31	1.03	3.36	1.38	5.12	58
96	1	38	126	72	88	1	0	1	0	1	1	0	0	9.71	12.44	1.8	5.39444	3	44	1.51	1.5	305.7	4.67	82.26	8.16	0.75	2.89	0.83	4.08	60
97	1	31	130	80	65	1	0	0	0	1	1	0	0	9.69	12.68	2.41	4.02075	1	32	32	2.5	492.6	5.41	98	5.98	2	3.8	0.79	5.27	60
98	1	29	123	69	86	1	0	0	1	1	1	1	1	9.66	11.9	1.32	7.31818	3	98	4.9	0.5	538	4.24	77	7.88	5.29	2.98	0.78	5.2	60
99	1	40	94	55	66	0	0	0	0	1	1	0	0	9.59	10.84	0.93	10.3118	3	38	599.1	7.9	275.4	4.07	66	8.39	8.74	0.77	0.5	3.45	58
100	1	27	126	68	71	0	0	0	0	2	1	0	0	9.57	12.52	2.11	4.53555	2	26	425.6	5.8	252.7	5.41	252.7	27.58	3.27	2.72	0.73	4.43	58
101	1	38	151	106	115	1	1	0	0	1	1	1	1	9.56	13.46	3.06	3.12418	3	140	4.3	104.5	356.6	4.65	67.65	6.12	1.41	4.1	1	5.19	58
102	1	33	154	122	81	1	0	0	0	1	1	0	0	9.54	13.21	2.64	3.61364	3	72	0.01	0.8	387.6	5.28	81.44	5.79	2.56	4.02	1.14	5.31	50
103	1	39	155	88	88	1	0	0	0	1	1	0	0	9.52	11.39	1.38	6.89855	1	80	0.05	7.8	452.4	5.56	88.78	7.29	3.22	3.45	0.93	4.85	50
104	1	36	106	94	61	1	1	0	0	1	1	0	0	9.5	13.15	2.73	3.47985	3	34	0.04	1.9	473.7	7.61	80.09	7.5	4.83	3.59	0.95	5.97	60
105	2	37	116	90	78	0	0	0	0	2	1	0	0	9.43	10.17	0.61	15.459	1	8	0.22	3.3	253.4	2.94	55	9.51	2.52	4.02	0.92	5.47	56
106	2	38	139	109	98	0	0	1	1	1	1	0	0	9.41	11.32	1.27	7.40945	1	13	0.03	0.8	329.3	4.74	70	7.89	2.85	4.48	1.29	6.28	60
107	1	38	126	104	98	1	0	0	1	1	1	0	0	9.36	12.01	1.42	6.59155	3	56	0.8	11.7	455.4	6.75	82	7.48	1.56	2.94	0.92	4.1	40
108	1	32	157	96	75	1	0	0	0	1	1	0	0	9.34	12.53	2.33	4.00858	1	26	1.33	44	268.6	4.91	75.9	4.91	7.59	0.88	3.68	1.73	55
109	1	39	135	104	93	1	0	1	1	1	1	0	0	9.3	12.58	2.8	3.32143	3	86	0.42	9.2	426.5	4.57	75.99	7.26	3.48	4.67	0.88	6.34	60
110	1	45	134	92	85	1	0	1	0	2	1	0	0	9.29	11.71	1.65	5.6303	2	12	1.07	7.6	283.9	5.49	72.46	18.1	16.91	2.18	0.66	7.2	58
111	1	27	104	63	70	1	0	0	0	1	1	0	0	9.27	10.2	0.65	14.2615	1	80	1.4	71.3	405.7	5.59	75.02	4.56	0.59	2.73	1.42	4.23	60
112	1	37	137	93	78	0	0	0	0	2	1	0	0	9.27	11.23	1.28	7.24219	1	86	0.04	2.2	454.7	5.64	71	6.93	1.83	2.9	0.73	4.11	59
113	1	35	113	86	89	1	0	0	0	1	1	0	1	9.25	11.45	1.4	6.60714	3	134	82	300	403.9	5.86	85	6.78	3.26	5.26	1.01	6.77	45
114	1	43	151	97	90	1	0	1	0	2	1	0	0	9.22	11.81	1.65	5.58788	3	47	4.13	71	253.6	7.41	65	6.6	0.76	2.96	1.13	4.22	50
115	1	43	127	94	58	1	0	1	0	2	1	0	0	9.22	15.01	4.56	2.02193	3	44	34.25	103.6	520	5.59	86.57	15.18	4.19	3.85	0.94	5.58	40
116	1	34	120	70	81	1	0	0	0	1	1	0	0	9.2	11.3	1.64	5.60976	2	26	0.07	2.1	404.8	5.99	70.96	6.83	1.36	4.85	1.12	6.07	57
117	1	35	99	77	129	0	0	0	1	2	2	1	1	9.19	12.1	1.88	4.8883	3	212	0.7	28.3	363.2	5.36	76.14	14.36	3.35	3.63	0.82	5.24	60
118	1	33	117	74	60	1	0	1	0	2	1	0	0	9.18	13.93	3.5	2.62286	2	63	0.32	1.3	311.4	4.69	69	24.54	1.66	3.71	1.06	5.11	50
119	1	37	137	92	71	1	1	1	0	2	1	0	0	9.15	11.67	1.37	6.67883	3	77	0.11	4.8	264.3	9.53	65.12	6.74	0.64	3.52	0.92	4.58	60
120	1	40	95	68	68	1	0	0	0	1	1	0	0	9.15	11.7	1.98	4.62121	3	53	0.13	4	437.7	3.7	72.36	10.27	1.83	3.02	0.78	3.92	60
121	1	35	178	107	92	0	0	1	0	1	1	0	0	9.1	11.51	1.98	4.59596	1	32	0.07	3.1	236.9	5.29	50.97	4.84	0.91	2	1.25	3.34	60
122	1	32	152	87	82	0	0	0	0	1	1	0	0	9.08	13.35	3.12	2.91026	3	28	1.7	59.3	438.1	6.42	78.65	10.09	6.84	3.41	0.96	5.48	45
123	1	38	132	89	90	1	1	0	0	1	1	1	0	9.03	14.4	4.34	2.08065	1	24	0.01	0.9	292.8	3.59	64	4.75	1.22	2.67	1.36	4.18	60
124	2	38	181	95	66	0	0	1	0	3	1	0	0	9.02	11.02	1.42	6.35211	1	26	1.13	84.3	460.3	5.14	76.36	5.32	3.28	4.13	0.96	5.73	54
125	1	33	80	50	60	0	0	0	0	1	4	1	1	9.02	15.46	5.46	1.65201	3	50	0.54	2.2	532.4	8.1	96.66	5.51	11.78	0.86	1.18	6.82	58
126	1	33	80	50	60	0	0	0	0	1	4	1	1	9.02	15.46	5.46	1.65201	3	50	0.04	1.6	425.2	5.74	73.5	6.21	12.33	4.69	0.88	7.68	60
127	1	41	134	95	64	1	0	0	0	1	1	0	0	9	10.42	0.79	11.3924	3	62	0.27	8.2	331.1	3.08	62.07	5.48	1.84	3.75	0.8	4.89	50
128	1	41	134	95	64	1	0	0	0	1	1	0	0	9	10.42	0.79	11.3924	3	54	0.79	14.2	338.4	7.3	128	11.44	1.62	2.21	0.77	3.11	60
129	1	38	116	81	60	1	0	1	0	1	1	0	0	8.99	12.43	2.76	3.25725	1	32	0.22	14.5	431.2	4.71	75.16	7.02	1.32	4.87	0.9	6.27	60
130	1	44	124	93	94	1	0	1	1	1	1	0	0	8.94	10.59	1.02	8.76471	3	45	0.35	2.7	321.6	3.37	63.84	5.66	1.89	0.93	0.83	2.13	45
131	1	42	124	93	94	1	0	0	0	1	1	0	0	8.94	10.59	1.02	8.76471	2	81	0.36	3.3	640	3.16	61.96	8.78	1.42	4.29	0.78	5.16	55
132	1	31	128	73	63	1	0	0	0	2	1	0	0	8.93	11.61	2.1	4.25238	2	24	0.17	15.7	708.3	5.86	77	2.08	0.66	9.33	0.66	9.33	41
133	1	42	139	98	80	1	0	1	0	1	2	1	1	8.92	9.91	0.83	10.747	1	50	1.07	8.6	342.1	4.09	81	8.03	4.61	5.94	0.77	8.04	63
134	1	42	135	98	80	1	0	1	0	1	2	1	1	8.92	9.91	0.83	10.747	3	47	3.37	39.4	737.7	11.76	5.04	11.76	4.28	3.57	0.67	5.64	55
135	2	45	137	75	59	1	0	0	0	1	2	1	1	8.89	12.3	2.64	3.36742	3	73	0.36	11.3	410.8	4.66	70	6.16	3.99	4.85	1.11	6.94	40
136	1	43	178	100	100	0	0	0	0	1	1	1	0	8.71	9.86	0.6	14.5167	1	80	0.01	1.7	390.4	6.05	105	12.33	5.64	1.54	0.82	3.58	60
137	1	36	152	107	68	1	0	0	0	1	1	0	0	8.61	14.74	4.82	1.78631	3	68	3.3	77.9	338.8	3.78	82	7.95	2.37	4.05	1.1	5.36	60
138	1	43	135	75	77	1	0	1	1	3	1	0	0	8.53	13.59	4.11	2.07543	2	49	0.01	61	442	3.27	74.56	5.01	3.43	4	1.07	5.87	60
139	1	32	137	70	81	1	1	0	0	1	1	0	0	8.52	11.61	1.77	4.81356	1	5	0.04	1.5	350.1	4.76	71	6.51	2.94	3.1	0.85	5	60
140	1	42	122	61	71	1	0	0	0	2	1	0	0	8.52	11.92	2.72	3.13235	3	45	81	299	397.6	5.31	87	6.47	1.33	3.77	1.18	5.21	38
141	1	38	130	88	50	1	0	1	0	1	1	0	0	8.51	10.18	0.89	9.5618	2	24	0.05	1.8	402.4	4.82	88	5	1.09	3.08	1.02	4.31	60
142	1	26	125	70	44	0	0	0	0	1	1	0	0	8.49	12.18	3.06	2.77451	1	2	5.39	154.8	455.6	3.85	76	6.92	2.78	3.83	0.76	5.05	60
143	1	44	141	94	80	0	0	1	1	1	1	0	0	8.47	12.63	2.92	2.90068	2	40	86	299	602	5.23	79	6.82	0.69	2.88	0.97	3.61	55
144	1	38	132	81	64	1	0	0	0	1	1	0	0	8.45	10.9	1.64	5.15244	2	26	0.01	0.7	663.3	5.54	90	9.47	2.31	5.16	0.9	6.36	55
145	1	43	138	94	84	1	0	0	1	3	1	0	0	8.44	10.88	1.53	5.51634	3	62	0.01	1.4	438.2	4.1	73	5.31	1.19	3.04	1.04	4.12	60
146	1	43	137	110	85	1	0	0	0	1	1	1	1	8.43	13.23	3.52	2.39489	1	85	0.59	20.8	467.2	5.43	102	7.43	2.12	2.8	0.88	4.19	58
147	1	41	137	110	85	1	0	0	0	1	1	1	0	8.43	13.23	3.52	2.39489	2	82	0.36	11.3	410.8	4.66	70	6.16	3.99	4.85	1.11	6.94	40
148	1	45	145	92	90	1	0	1	1	3	1	0	0	8.4	13.25	4.07	2.06388	3	31	0.01	1.6	553.4	5.56	88	6.62	4.07	2.66	0.98	4.61	56
149	1	35	167	114	78	0	0	1	0	1	1	0	0	8.39	10.19	1.32	6.35606	1	32	0.01	0.5	399.4	4.89	59	5.41	1.78	1.9	1.22	3.57	60
150	1	35	160	106	98	1	1	0	0	1	1	0	0	8.38	10.55	1.22	6.86885	1	53	1.37	1.6	483.4	6.95	73	7.35	9.48	3.69	0.7	6.15	60
151	1	33	111	60	62	1	0	0	0	1	1	0	0	8.37	11.71	2.36	3.54661	1	34	81	299	397.6	5.31	87	6.47	1.33	3.77	1.18	5.21	38
152	1	34	161	116	69	1	0	1	0	1	1	0	0	8.29	5.39	1.86	4.45699	2	84	0.01	0.7	361.2	5.43	59	7.08	1.36	4.11	1.06	5.61	50
153	1	34	120	82	76	1	0	0	0	1	1	0	0	8.28	11.77	2.38	3.47899	3	67	0.27	13.4	346.8	3.83	64	15.19	2.75	3.92	0.73	5.7	60
154	1	34	120	82	76	1	0	0	0	3	1	0	0	8.28	11.77	2.38	3.47899	3	67	0.01	1	430.7	4.95	68	5.26	1.91	3.01	0.89	4.47	60
155	1	35	132	85	91	1	1	1	0	1	1	0	1	8.26	13.45	4.14	1.99517	1	82	0.11	7.8	488.1	6.46	91	8.18	4.94	6.72	0.73	9.53	49
156	1	40	118	77	53	1	1	1	0	1	1	0	0	8.24	11.37	2.02	4.07921	2	39	0.03	1	449.8	4.64	69	15.02	3.06	1.88	0.76	3.69	60
157	1	45	132	77	90	1	0	1	0	3	3	0	0	8.24	9.99	1.11	7.42342	1	3	6.81	263.2	363.9	6.8	81.2	7.25	1.96	3.71	1.14	5.22	52
158	1	35	174	108	89	1	0	0	1	1	1	0	0	8.23	9.96	1.37	6.0073	3	83	0.05	1.7	527.2	5.97	93	7.06	3.86	5.45	0.94	7.4	62
159	1	31	103	65	80	0	0	0	0	1	1	0	0	8.22	9.67	1.05	7.82857	2	50	0.29	17.9	276.2	4.83	63	7.63	1.77	2.7	0.77	3.98	56
160	1	33	125	87	84	1	0	0	0	1	1	0	0	8.1	10.45	1.95	4.15385	2	82	2.06	23.6	602.8	3.7	78	5.37	3.36	3.31	0.85	5.19	55
161	1	38	105	70	60	0	0	0	0	1	1	0	0	8.09	9.64	1	8.09	2	25	0.01	0.6	347.6	4.53	70	7.67	1.07	7.71	0.8	9.19	50
162	1	41	108	70	58	1	0	0	0	1	1	0	1	8.09	10.76	1.94	4.1701	1	32	0.03	1	458.9	4.41	70	7.66	2.06	3.49	0.77	5.13	60
163	1	38	108	64	67	1	0	0	0	1	1	0	0	8.05	11.15	2.51	3.20717	1	8	0.01	1	311.2	6.16	82	4.94	1.98	3.24	1.04	4.55	55
164	1	37	153	76	70	1	1	1	0	3	1	0	0	8.02	11.11	1.94	4.13402	3	10	0.1	8.2	614.2	6.12	76	6.97	5.01	4.06	1.24	6.71	58
165	1	36	125	76	81	0	0	0	0	2	2	0	0	8.02	10.08	1.44	5.56944	1	39	2.24	116.8	373	4.82	78	6.75	1.17	3.7	1.25	5.16	58
166	1	25	146	105	86	0	0	0	0	1	1	0	0	7.93	11.61	3.11	2.54984	1	32	0.19	3.3	337.8	3.43	72	4.6	1.85	4.96	1	6.19	45
167	1	41	118	64	64	1	1	0	0	1	1	0	0	7.92	9.66	1.17	6.76923	2	54	0.06	3	389.8	4.27	80	11.88	1.76	2.99	0.77	4.12	60
168	1	42	124	92	99	1	1	0	0	1	3	1	1	7.87	12.47	3.04	2.58882	1	93	0.28	12.9	439.3	8.95	91.5	6.34	2.99	3.96	0.69	5.49	60
169	1	35	162	107	94	0	0	1	0	1	1	0	1	7.86	9.34	1.14	6.89474	3	51	0.6	5.3	297.4	4.25	59.8	7.51	0.53	2.26	0.99	3.34	58
170	1	38	180	113	70	0	0	1	1	1	1	0	0	7.84	11.34	2.69	2.9145	2	70	0.3	5.6	549.4	5.5	70.5	6.02	4.17	2.4	0.72	4.4	58
171	1	43	152	97	108	0	0	0	0	2	1	0	0	7.81	11.15	2.6	3.00385	2	26	0.38	9.5	334.5	5.99	84.3	5.25	1.78	3.78	0.94	5.04	55
172	1	32	113	63	75	1	0	0	0	1	1	0	0	7.77	10.16	1.9	4.08947	2	37	10.57	78.5	335.8	5.75	122.6	12.19	1.46	3.65	1.04	4.76	57
173	1	32	128	69	88	1	0	0	0	1	1	0	0	7.75	10.45	1.98	3.91414	3	26	0.03	1.8	461.4	4.7	91.4	9.64	1.74	3.49	1.02	5.03	60
174	1	37	184	121	87	1	0	1	0	2	1	0	0	7.72	10.22	1.98	3.89899	3	50	0.04	1	309.2	6.26	73.4	6.77	1.74	2.24	0.62	3.32	60
175	1	32	162	96	62	1	0	0	0	1	1	0	0	7.68	11.44	3.02	2.54305	1	35	0.05	1.2	596.8	4.73	86.5	6.33	1.68	3.4	1.09	5.1	45
176	1	30	183	79	57	1	0	0	0	1	1	0	0	7.66	13.26	4.88	1.56967	1	9	3.3	48.6	326	2.69	68.9	5.99	1.02	2.75	1.16	3.83	60
177	1	34	160	120	72	1	0	1	0	1	1	0	0	7.66	11.65	2.97	2.57912	3	59	0.11	8.3	396.7	4.31	82.5	12.33	4.33	2.89	0.61	4.81	45
178	1	23	112	90	75	1	0	0	0	1	1	0	0	7.61	10.05	1.96	3.88265	2	82	1.33	44	268.6	4.91	75.9	5.89	0.88	3.68	1.73	5.78	55
179	2	32	114	69	58	0	0	1	0	1	1	0	0	7.6	8.85	1.01	7.52475	3	126	0.53	3.9	297.7	6.51	66.3	16.8	0.93	3.6	0.91	4.68	57
180	2	32	114	69	58	0	0	1	0	1	1	0	0	7.6	8.85	1.01	7.52475	3	130	0.32	6.2	230.3	4.56	56.1	6.63	2.01	2.71	1.04	4.11	60
181	1	33	135	73	74	1	0	0	0	1	1	0	0	7.59	10.7	2.38	3.18908	3	70	0.42	30.1	522.3	8.27	87.1	6.42	2.72	6.74	1.45	8.43	55
182	1	33	135	73	74	1	0	0	0	1	1	0	0	7.59	10.7	2.38	3.18908	3	72	0.02	1.5	497.4	7.09	91.2	5.37	0.7	3.18	1.04	4.36	60
183	1	38	149	108	80	0	1	0	0	1	1	0	1	7.52	16.44	7.62	0.986877	1	80	8.86	193.1	273.1	3.05	74.5	5.91	0.43	4.82	1.21	6.12	60
184	1		126	80	78	1	0	0	0	1	1	0	0	7.5	10.48	2.26	3.31858	1	34	0.25	8.7	284.6	5.22	82	7.19	2.56	2.69	0.61	4.62	55
185	1	38	145	108	72	0	0	0	0	2	1	0	0	7.44	10.2	2.17	3.42857	2	57	0.02	1.1	487.4	8.01	157	12.4	3.8	2.69	0.81	4.85	53
186	1	38	160	116	74	1	0	1	0	1	1	0	0	7.43	9.92	1.82	4.08242	3	97	0.03	1.1	320.4	5.05	75.6	10.23	1.57	6.21	0.9	7.92	51
187	1	43	130	92	81	0	0	1	0	1	1	0	0	7.43	11.4	3.14	2.36624	2	82	1.66	1.7	492.7	3.76	63.3	10.17	10.08	1.57	0.54	5.28	56
188	1	34	129	94	95	0	1	1	0	2	1	0	0	7.41	9.21	1.34	5.52985	0	0	0.12	4.8	426.5	5.83	80.3	6.38	2.7	4.2	0.56	5.85	60
189	1	40	142	102	68	1	0	0	0	1	1	0	0	7.4	10.98	2.69	2.75093	3	56	0.02	1.4	386.9	6.49	85.5	10.48	5.3	3.04	1.09	4.76	55
190	1	41	154	98	84	0	0	0	0	1	1	1	1	7.4	12.78	4.73	1.56448	3	30	0.05	1.2	295.6	4.51	71	5.21	1.21	3.22	1.07	4.63	60
191	1	42	191	112	67	0	0	1	0	1	1	0	0	7.38	10.5	2.03	3.63547	2	48	25374	301	304.4	5.76	76	9.96	0.66	3.37	0.61	4.29	59
192	1	31	139	86	72	1	1	0	1	2	1	0	0	7.37	10.21	2.12	3.47642	2	37	15.8	3	400.9	5.95	80		5.48	4.11	0.8	6.42	45
193	1	41	146	93	64	1	0	0	0	2	1	0	0	7.35	8.86	0.97	7.57732	2	34	7.5	54.7	498.7	6.01	74	4.79	1.41	4.92	1.69	7.08	60
194	1	40	139	95	83	1	0	0	0	1	1	0	0	7.3	12.32	3.58	2.03911	3	53	8.27	80.7	312.7	4.57	72	5.9	1.55	1.91	1.07	3.38	60
195	1	38	144	95	75	1	0	1	0	3	1	0	0	7.29	10.85	2.68	2.72015	1	3	13.17	121	382.4	5.63	58	6.18	3.89	3.1	1.15	5.59	60
196	1	37	116	61	78	1	0	0	0	1	1	0	0	7.26	11.79	3.74	1.94118	2	24	65.22	295	367.8	5.2	71	6.78	1.61	2.95	0.94	4.13	58
197	1	44	120	90	73	0	0	1	0	1	1	0	0	7.21	9.15	1.36	5.30147	3	90	46.77	76.2	376	6.69	73	6.12	2	2.36	0.86	3.76	60
198	1	34	110	80	63	0	0	1	0	1	1	0	1	7.19	9.3	1.78	4.03933	3	84	0.23	7.5	209.2	4.75	69	6.47	7.74	2.67	1.31	4.32	41
199	1	43	107	70	58	1	0	1	0	1	1	0	0	7.18	13.61	5.25	1.36762	3	41	0.57	1.8	345.9	4.27	80	5	1.72	4.7	1.03	5.81	60
200	1	34	119	53	81	1	0	0	0	2	1	0	0	7.18	9.93	2.21	3.24887	1	21	0.02	1.4	427.9	5.85	78.1	6.27	2.47	7.33	0.96	8.92	55
201	1	42	114	68	53	1	0	0	0	2	1	0	0	7.09	9.76	1.82	3.8956	3	121	0.01	2.8	549.9	5.63	58	5.83	4.03	3.16	0.77	5.35	46
202	1	41	188	112	93	1	0	1	0	1	1	0	0	7.08	10.74	2.99	2.36789	3	31	0.57	1.8	345.9	4.27	80	5	1.72	4.7	1.03	5.81	60
203	1	30	110	80	88	1	1	0	0	1	2	1	1	7.07	17.26	8.75	0.808	1	6	1.75	36.4	283.3	5.02	95.8	9.84	1.54	4.5	0.89	5.93	58
204	1	41	121	91	111	0	0	0	1	1	1	1	1	7.06	10.08	2.14	3.29907	3	164	2.06	23.6	602.8	3.7	78	5.37	3.36	3.31	0.85	5.19	55
205	1	28	191	142	94	1	0	1	1	1	1	0	0	7.03	9.76	2.17	3.23963	3	66	0.03	1.4	302	7.73	63	8.09	4.99	4.91	0.86	6.23	55
206	1	41	140	100	66	1	0	0	0	2	1	0	0	6.99	10.88	2.82	2.47872	2	26	17.21	54.9	425.8	5.2	79	7.64	1.06	3.41	1.42	5	66
207	1	43	95	75	69	1	1	0	0	1	1	0	0	6.98	15.36	7.03	0.992888	1	41	0.04	2.7	430.7	6.54	121	12.79	1.56	2.79	1.05	4.17	40
208	1	35	136	90	80	1	0	1	1	1	1	0	0	6.98	11	3.4	2.05294	1	32	8.34	1.19	529.2	5.92	90.8	7.89	1.18	3.64	0.83	4.71	60
209	1	34	135	70	96	0	0	0	0	1	1	0	0	6.96	13.88	5.56	1.2518	3	41	1009.4	11.6	244.1	4.47	55	5.93	0.51	2.8	1.5	4.32	60
210	1	44	155	108	80	1	0	1	0	2	1	0	0	6.95	10.12	2.39	2.90795	3	89	5.31	2.06	394	3.35	60.8	6.44	5.7	2.27	0.8	4.79	60
211	1	25	157	86	76	1	1	0	0	1	1	0	0	6.95	11.04	3.07	2.26384	1	8	2.1	2.09	350	4.23	65.9	6.39	1.66	4.37	1.07	6.05	56
212	1	35	130	100	67	1	0	0	0	1	1	0	1	6.94	17.35	8.74	0.79405	2	89	2339	126.1	557.01	6.17	82.98	9.25	6.58	2.25	0.62	4.86	59
213	1	34	125	66	64	1	1	0	0	1	1	0	0	6.93	11.01	3	2.31	1	16	23.5	1.41	417.25	4.19	58.71	13.12	1.17	3.3	0.74	4.4	44
214	1	42	117	71	71	1	0	1	1	1	1	0	0	6.92	8.72	1.27	5.44882	1	33	7.92	2.36	367.3	5.03	68.9	4.74	3.33	2.75	0.98	4.49	56
215	1	39	149	113	82	0	0	1	0	2	1	0	0	6.92	9.44	1.9	3.64211	3	71	41.43	3.93	386	4.29	77.9	5.72	1.69	3.99	0.81	5.27	55
216	1	34	168	118	92	1	0	1	1	2	1	0	0	6.9	11.15	3.28	2.10366	1	19	300.2	41.8	559.8	9.13	68	6.24	0.88	1.9	1.34	3.31	45
217	1	33	133	99	88	1	0	0	0	1	1	0	0	6.9	8.82	1.52	4.53947	1	16	10.8	2.7	568.4	9.72	113	12.97	3.35	2.56	0.8	4.25	60
218	1	41	160	113	65	0	0	0	0	1	1	0	0	6.89	12.12	4.23	1.62884	2	44	28.4	1.3	477	6.42	118	10.71	3.76	2.29	0.85	4.26	57
219	1	33	130	88	85	0	1	0	0	1	1	0	0	6.88	15.39	7.71	0.892348	3	72	120.9	11.5	244.2	4.86	68.9	6.86	1.91	3.42	0.75	4.4	54
220	1	42	100	70	55	1	0	0	0	2	1	0	0	6.82	11.62	3.58	1.90503	1	32	66.7	7.48	230	3.81	47.2	5.09	1.1	3.35	1.13	4.61	52
221	1	36	157	86	98	1	0	0	0	1	1	1	0	6.8	10.17	2.2	3.09091	1	80	34.19	3.93	273.2	5.1	103.7	34.69	1.14	3.27	0.95	4.69	36
222	1	45	144	91	79	0	0	1	0	2	1	0	0	6.8	7.83	0.48	14.1667	2	87	2.2	1.2	200.9	3.98	51	9.38	0.92	1.69	1.17	3.11	60
223	1	38	132	72	80	1	1	0	0	2	1	0	0	6.79	9.62	2.25	3.01778	2	104	129.4	7	493.9	5.5	100.7	4.44	1.76	3.48	1.23	5.31	48
224	1	36	135	99	76	0	0	1	0	1	1	0	0	6.78	10.62	3.05	2.22295	3	48	567	105	345.2	6.77	73.5	4.92	0.83	2.45	0.93	3.74	57
225	1	44	112	59	80	0	0	1	0	2	1	0	0	6.78	10.07	2.09	3.24402	3	63	84	2	378.5	3.75	73	5.38	9.07	2.48	0.75	5.1	58
226	1	36	135	99	76	0	0	1	0	1	1	0	0	6.78	10.62	3.05	2.22295	3	48	38.54	3.71	364.2	4.23	82.5	6.81	1.59	3.38	1.07	4.93	47
227	1	42	147	107	95	0	0	0	0	1	1	0	0	6.76	9.95	2.5	2.704	2	82	4782.5	67.8	285.9	5.27	76	6.39	1.44	2.51	1.01	4.03	52
228	2	37	97	64	80	0	0	0	0	1	4	1	1	6.75	9.05	1.43	4.72028	3	80	385.5	87.7	282.5	5.28	68	5.14	2.89	3.61	1.01	5.55	59
229	1	32	153	105	81	1	1	1	1	1	1	0	0	6.66	8.52	1.18	5.64407	3	30	14.83	1.71	319.3	7.18	74	4.47	1.31	3.62	5.24	5.24	57
230	1	41	148	69	72	0	0	1	1	2	1	0	0	6.66	9.01	1.94	3.43299	2	17.5	92.79	3.62	232.2	4.12	110	5.23	0.89	2.87	0.8	3.91	54
231	1	44	138	88	81	1	1	0	0	1	1	0	0	6.66	8.52	1.37	4.86131	2	62	1942.7	115.2	351.9	5.6	102.9	4.49	3.51	2.19	0.88	4.22	57
232	1	36	144	108	108	1	0	0	0	1	1	0	0	6.61	11.41	3.99	1.65664	3	102	83.86	29.84	367.7	4.27	70.1	5.69	0.42	1.81	1.11	2.96	59
233	1	40	159	100	84	1	0	1	0	2	1	0	0	6.54	9.37	2.06	3.17476	3	34	974.6	17.6	471	5.42	94.5	5.17	1.2	3.73	0.92	4.65	55
234	1	28	110	80	84	0	0	0	0	1	1	0	0	6.53	12.6	5.27	1.23909	1	32	52.44	2.63	321	5.22	60.6	11.78	4.31	2.91	0.75	4.97	60
235	1	41	130	79	79	0	0	0	0	3	1	0	0	6.53	8.6	1.46	4.4726	2	9	7.02	1.3	572	5.03	76.5	9.4	4.99	2.38	0.71	4.37	60
236	1	46	106	70	56	1	1	1	0	2	1	0	0	6.5	8.26	1.23	5.28455	3	33	6.18	1.02	243	6.07	69.2	8.53	4.39	2.71	0.75	4.44	55
237	1	39	146	94	83	0	0	0	0	1	1	0	0	6.5	11.96	4.42	1.47059	1	32	364.7	55.35	218.3	3.93	54.4	4.72	0.9	3.69	1.24	5.13	62
238	1	41	138	85	84	1	0	1	0	3	1	0	0	6.5	9.37	2.05	3.17073	3	38	296.1	25.4	376.1	5.44	76.9	4.21	1.63	3.99	0.76	5.51	60
239	1	38	150	89	82	1	1	1	1	1	1	0	0	6.49	9.2	2.09	3.10526	3	18	45.43	1.75	427.5	6.86	92.1	6.68	1.6	4.44	1.02	6.05	51
240	1	39	121	70	85	1	0	0	0	3	1	0	0	6.47	9.01	2.06	3.14078	1	2	463.3	96.9	322.5	3.45	71	6.41	0.61	3.4	1.48	5.04	50
241	1	38	117	89	84	1	0	0	0	1	1	0	0	6.43	10.92	3.24	1.98457	2	52	4.69	1.95	418	3.63	82	22.47	3.32	3.22	0.79	4.86	60
242	1	40	146	102	73	1	0	1	0	2	1	0	0	6.41	7.76	1.1	5.82727	2	112	18.51	2.16	397.5	3.74	75	19.31	5.9	3.56	1.04	6.16	37
243	1	41	126	77	69	1	1	0	0	2	1	0	0	6.4	10.71	2.97	2.15488	3	39	134.8	17.79	201.7	5.96	69.7	8.51	2.64	3.02	0.78	4.66	60
244	1	32	163	102	15	1	0	0	0	2	1	0	0	6.4	7.99	0.9	7.11111	3	15	46.22	9.81	368.9	3.44	68.3	4.06	1.41	3.1	0.93	4.3	51
245	1	33	126	89	89	1	0	0	0	1	1	0	0	6.4	10.81	3.61	1.77285	1	32	265.6	23.79	267.1	6.14	86.2	4.79	1.91	2.56	1.11	4.16	60
246	1	39	130	100	103	1	1	1	1	2	1	1	1	6.4	8.03	1.16	5.51724	3	136	7.78	1	429.3	4.85	74.8	6.15	2.32	5.16	1.21	6.85	58
247	1	37	153	101	63	1	0	0	0	2	1	0	0	6.38	10.91	3.28	1.94512	3	99	172.9	66.91	413.7	5.74	60.6	6.65	1.5	3.56	0.98	4.9	60
248	1	34	138	96	68	1	1	0	0	1	1	0	0	6.38	9.9	2.64	2.41667	2	52	108.1	21.2	538.6	4.6	93.1	15.73	1.61	6.17	0.8	7.42	42
249	1	29	163	114	60	0	0	0	0	1	1	0	0	6.38	12.21	4.97	1.2837	1	41	90.28	4.81	344.5	4.49	79.2	4.01	4.49	3.05	1.33	4.49	55
250	1	34	138	96	68	1	1	0	0	1	1	0	0	6.38	9.9	2.64	2.41667	2	52	364.6	36.17	651.3	3.72	75.2	5.64	1.72	2.99	0.8	4.27	56
251	1	39	148	91	102	0	0	1	0	2	1	0	0	6.38	9.32	2.43	2.62551	3	124	73.27	1.62	483.8	6.7	82.7	7.82	6.76	3.31	0.92	6.37	62
252	1	40	139	100	101	1	0	0	0	3	1	0	0	6.38	9.69	2.37	2.69198	3	76	1181	220.5	364	6.33	55.1	5.71	0.95	3.43	1.14	4.82	53
253	1	34	158	109	59	1	0	0	0	1	1	0	0	6.37	9.1	1.98	3.21717	1	32	370.2	35.48	281.2	4.77	56.4	8.97	0.51	2.75	0.79	3.54	57
254	1	43	142	81	90	0	0	0	0	2	1	0	0	6.35	8.2	1.45	4.37931	1	32	759.2	218.6	489.8	6.11	76.4	4.51	5.18	3.76	1.05	5.18	58
255	1	41	136	114	82	1	0	0	0	1	1	1	0	6.34	7.31	0.62	10.2258	1	32	5.34	2.45	466.7	6.83	67.8	5.95	1.03	2.87	0.94	3.99	55
256	1	39	171	96	68	1	0	1	1	2	1	1	1	6.32	8.84	1.66	3.80723	3	70	7.88	1.99	314.7	5.93	88.6	5.56	3.36	2.69	0.95	4.35	53
257	1	37	108	73	48	0	0	0	1	1	4	0	1	6.29	10.24	3.25	1.93538	3	58	35.53	4.65	390.8	3.93	54.9	16.5	2.43	4.07	1.07	5.51	56
258	2	42	138	89	89	0	0	0	0	3	1	0	0	6.27	9.24	1.76	3.5625	1	20	649.3	228.4	469.3	6.09	85.6	5.87	2.33	4.81	1.08	6.12	54
259	1	39	141	83	67	1	0	1	0	1	1	0	0	6.26	8.39	1.27	4.92913	3	33	6.88	0.99	292	4.12	55.1	9.45	2.27	2.59	0.95	3.88	60
260	1	33	121	74	83	0	0	1	0	3	1	0	0	6.26	9.54	2.53	2.47431	1	3	7.56	1.21	384.4	4.82	81.7	5.93	1.48	2.66	1.45	4.35	60
261	1	40	156	86	73	0	0	0	0	1	1	0	0	6.23	10.63	3.59	1.73538	3	116	4.45	0.83	338.6	7.74	89.2	6.05	1.71	3.52	1.09	4.71	55
262	1	38	132	100	56	1	0	0	0	2	1	0	0	6.22	8.53	1.65	3.7697	1	80	523.6	2.39	312	4.96	56.7	10.87	19.23	2.96	0.54	7.6	60
263	1	45	141	79	80	1	0	0	0	3	1	0	0	6.22	7.99	1.23	5.05691	2	18	0.012	1.76	329.56	9.65	59.56	8.38	1.23	3.7	0.43	6.4	55
264	1	41	121	84	83	1	1	0	1	3	1	1	0	6.19	10.16	2.77	2.23466	1	3	9.54	2.28	262.2	4.86	75.6	10.78	3.72	1.37	0.82	3.23	60
265	1	34	140	81	64	0	0	1	1	1	1	0	0	6.19	10.16	3.13	1.97764	1	10	6.2	1.15	377.8	6.8	74.4	5.67	1.61	1.74	0.74	2.86	55
266	1	41	106	74	25	0	0	0	1	1	1	0	1	6.18	10.88	3.81	1.62205	3	93	54.58	0.9	279.2	6.25	59.8	17.4	1.84	1.95	0.86	3.23	57
267	1	38	136	90	80	0	0	0	1	1	1	0	0	6.16	11.35	4.3	1.43256	3	66	26.52	5.1	365.46	5.69	48.38	22.86	5.23	3.81	0.95	5.5	51
268	1	35	142	96	90	0	0	0	0	2	1	0	0	6.15	8.59	1.82	3.37912	1	39	5.97	1.36	383.4	5.66	63.3	5.77	2.78	2.75	0.86	4.13	60
269	1	39	103	65	72	1	0	0	0	3	1	0	0	6.15	9.02	2.22	2.77027	3	63	4.33	0.7	316.2	5.55	49.5	8.79	3.41	2.86	1.07	4.85	55
270	1	39	168	102	69	1	0	0	0	1	1	0	0	6.14	8.26	1.68	3.65476	2	57	4.58	0.82	464.7	9.59	86.7	6.38	2.92	4.72	0.82	6.21	60
271	1	37	180	130	78	1	0	0	0	1	1	0	0	6.11	10.6	3.76	1.625	2	28	43.53	8.03	555.78	8.49	81.87	9.3	2.05	3.14	1.11	4.62	60
272	1	37	159	107	73	1	0	0	0	1	1	0	0	6.11	9.19	2.52	2.4246	3	56	107.9	18.99	332.51	4.12	57.68	6.1	0.87	4.6	1.05	5.7	59
273	1	38	160	101	80	0	1	1	0	2	1	0	0	6.1	9.97	3.11	1.96141	2	34	1.56	37	343.3	4.63	60.4	6.41	3.08	5.1	0.94	6.97	55
274	1	31	156	107	90	0	0	0	1	1	1	0	0	6.1	10.61	3.59	1.69916	2	81	0.18	12.1	300.5	4.69	53	8.55	2.14	3.14	0.87	4.47	60
275	1	41	131	90	68	1	1	1	0	1	1	0	0	6.08	8.54	1.4	4.34286	3	35	0.05	1	454.4	6.45	85.6	5.31	5.42	3.93	0.97	5.42	58
276	1	41	172	100	79	1	1	1	0	2	1	0	0	6.08	8.95	2.24	2.71429	2	48	0.05	2.4	348.8	5.41	72.9	6.55	1.57	3.71	0.95	4.7	55
277	1	35	108	76	53	1	0	0	0	3	2	0	0	6.05	8.65	2.15	2.81395	2	41	3.97	5.7	443.5	7.85	117	15.46	1.38	2.65	0.84	3.76	35
278	1	35	108	76	53	1	0	0	0	3	2	0	0	6.05	8.65	2.15	2.81395	2	41	0.05	2	632.7	8.14	107.5	5.9	3.58	3.59	1.12	5.62	58
279	1	36	195	123	83	0	0	0	0	1	1	0	0	6.01	7.31	1.04	5.77885	3	50	2.9	1.2	461.7	5.8	66	8.58	2.35	3.24	0.81	4.79	63
280	1	33	169	110	96	0	1	1	0	1	1	0	0	5.99	8.71	2.05	2.92195	1	24	0.05	1	430.5	6.23	66.3	10.36	2.19	1.99	0.91	3.31	48
281	1	32	106	65	54	1	0	0	0	1	1	0	0	5.98	8.31	1.85	3.23243	2	62	0.07	4.8	624.5	7.01	59.4	8.43	7.08	2.62	0.83	4.55	48
282	1	41	97	71	90	0	0	0	0	1	2	0	0	5.97	11.6	4.41	1.35374	1	80	14488.3	6	359.7	5.36	89	19.9	1.24	3.74	1.21	5.36	34
283	1	42	126	100	80	1	0	0	0	1	1	0	1	5.97	10.04	2.89	2.06574	2	60	0.15	4.9	379.5	5.54	64.4	4.56	0.76	3.76	1.27	5.15	55
284	1	33	117	72	79	0	0	0	0	1	1	0	0	5.96	11.5	4.69	1.27079	1	42	0.05	1.3	398.9	5.4	81.7	4.46	1.5	5.11	1.31	6.57	59
285	1	36	190	140	100	0	0	1	0	1	1	1	0	5.94	9.38	2.59	2.29344	2	96	7086.4	23.4	373.2	6.91	87	5.85	2.39	7	1.07	8.37	60
286	1	43	136	78	69	1	0	0	0	1	1	0	0	5.92	9.3	2.42	2.44628	2	26	0.05	1	250.2	4.69	67.4	5.59	1.13	4.05	1.06	5.33	59
287	1	32	122	84	88	1	0	0	0	1	1	0	0	5.88	9.25	2.3	2.55652	1	3	4.5	1.5	271.1	8.73	67	17.43	6.95	1.85	0.6	3.59	60
288	1	38	170	110	75	1	0	0	0	1	1	0	0	5.87	10.62	3.96	1.48232	3	37	2.1	0.6	278	5.34	62	7.72	1.85	2.95	1.38	4.67	60
289	1	40	120	94	84	0	0	1	1	2	1	0	0	5.86	7.18	0.86	6.81395	1	68	2766.6	8.9	335.1	2.33	59	6.82	1.97	3.41	1.04	4.72	60
290	1	41	156	114	78	1	0	0	0	1	1	1	0	5.85	10.94	4.15	1.40964	1	35	1115	111.9	422.7	4.45	66	4.78	2.19	3.86	0.91	5.38	54
291	1	38	156	114	78	1	0	0	0	1	1	1	0	5.85	10.94	4.15	1.40964	2	35	1903.8	1.7	438.7	6.06	71	19.84	2.98	3.48	0.65	4.96	48
292	1	35	112	72	74	1	1	0	1	1	1	0	0	5.83	7.87	1.57	3.71338	3	50	3.9	0.6	348	6.2	74	8.08	1.87	3.35	0.75	4.47	60
293	1	42	129	90	68	1	0	0	0	2	1	0	0	5.82	9.19	2.39	2.43515	3	106	1.5	1.2	410.4	4.64	72	5.24	2.52	2.81	0.94	4.4	60
294	1	33	146	90	86	0	1	0	0	1	1	0	0	5.75	9.7	2.92	1.96918	3	51	875	2.8	307.3	6.75	62	14.44	6.24	2.04	0.81	4.21	58
295	1	38	93	41	58	0	0	0	0	1	4	0	1	5.75	7.26	0.93	6.1828	1	16	9.32	1.73	418.5	3.58	55.1	5.32	1.23	3.68	1.19	5.06	56
296	1	32	136	89	75	1	0	0	0	3	1	0	0	5.75	9.3	2.94	1.95578	1	5	100.9	8.1	280.6	3.06	76	4.59	1.58	2.57	0.87	4.03	60
297	1	39	120	79	58	1	0	0	0	1	1	0	0	5.66	7.77	1.38	4.10145	1	36	8.56	2.76	309.8	5.47	83	6.12	1.08	1.37	0.95	2.45	62
298	1	37	124	86	64	1	0	0	0	1	1	0	0	5.66	8.25	1.94	2.91753	3	44	2.4	1.1	276.4	3.13	93	4.39	1.56	2.95	0.91	4.28	65
299	1	31	137	87	98	1	0	0	0	2	1	0	0	5.65	9.5	2.46	2.29675	1	3	148.3	17.78	489.1	4.2	59.9	3.97	1.24	4.6	1.12	6.04	54
300	1	36	142	87	99	0	1	0	1	1	1	0	0	5.61	8.71	2.3	2.43913	1	40	2.1	1.7	406	5.6	76	5.32	1.02	4.03	1.12	5.25	60
301	2	45	174	110	111	0	0	1	1	1	4	0	1	5.61	7.26	1.37	4.09489	1	12	23.79	3.93	380.8	5.93	81.9	4.39	1	4.4	1.12	5.58	58
302	2	45	174	110	111	0	0	0	0	1	4	0	0	5.61	7.26	1.37	4.09489	1	24	298.8	71.9	381	8.07	60.8	16.02	2.69	3.85	0.76	5.23	50
303	1	43	142	94	60	1	0	0	0	2	1	0	0	5.57	8.22	2.17	2.56682	3	32	1705.1	10.7	340	3.81	69	5.96	4.08	5.12	0.59	7.22	60
304	1	38	150	89	117	1	1	0	0	2	1	0	0	5.57	8.4	2.32	2.40086	3	70	80.1	4.2	355.3	3.51	67	6.9	4.35	2.62	1.08	4.35	44
305	1	34	140	100	66	1	0	0	0	1	1	1	0	5.57	8.14	2.24	2.48661	3	64	18.1	4.21	504.6	4.15	69.2	5.72	1.11	3.77	1.57	5.79	50
306	1	39	149	99	82	1	0	1	0	1	1	0	0	5.55	8.08	1.77	3.13559	3	100	2.6	0.8	506.2	4.63	80	7.77	2.38	1.92	0.93	3.54	62
307	2	40	111	76	65	0	0	0	0	3	1	0	0	5.53	8.88	2.66	2.07895	2	9	16.26	1.3	245.6	7.73	72.7	7.79	0.64	2.78	1.16	4.08	52
308	1	33	156	87	87	1	0	0	0	3	1	0	0	5.52	8.99	2.21	2.49774	1	3	96.68	18.6	390	6.02	79	7.03	0.92	5.23	1.2	7.35	45
309	1	40	151	62	62	1	0	0	0	1	2	1	1	5.48	8.84	2.82	1.94326	3	94	77.94	4.6	213.3	4.24	39	8.56	0.4	2.61	1.18	3.98	60
310	1	37	141	96	65	1	0	1	0	3	2	0	0	5.45	8.82	2.55	2.13725	2	43	1.1	19.7	329.8	5.85	76	18.13	3.74	4.44	0.81	6.32	60
311	1	35	130	90	64	1	0	0	0	1	1	0	0	5.44	10.73	4.63	1.17495	3	44	4.5	1.2	453.2	3.98	78	4.27	2.83	3.37	0.83	4.92	60
312	1	41	130	85	78	1	0	0	0	1	1	0	0	5.41	7.83	1.79	3.02235	2	61	10.4	2.4	450.8	5.49	81	6.83	5.27	4.33	0.91	6.47	60
313	1	43	192	111	95	1	0	1	0	3	1	0	0	5.41	8.25	1.86	2.9086	2	30	6888.3	16.1	504.1	5.33	90	10.28	1.66	3.36	0.95	3.65	28
314	1	40	136	89	78	1	0	1	0	2	1	0	0	5.39	8.29	1.82	2.96154	2	7	0.05	1	466	3.75	63	13.6	8.95	3.72	0.86	6.46	58
315	1	42	146	90	86	1	0	1	1	1	1	0	0	5.38	9.31	3.19	1.68652	2	52	0.05	1	342.9	6.02	95	10.18	0.95	2.95	0.92	3.91	59
316	1	43	125	86	96	1	0	0	0	2	1	0	0	5.35	7.5	1.47	3.63946	1	43	2.406	51.8	420.9	3.52	57	5.54	2.2	3.29	0.87	4.75	57
317	1	39	144	84	84	1	0	0	0	1	1	0	0	5.35	10.51	4.26	1.25587	3	95	2.2	0.7	408.1	4.52	90	6.08	2.05	2.48	0.92	4.1	65
318	2	41	112	73	84	0	1	0	0	3	2	0	0	5.34	7.74	1.38	3.86957	1	32	2	0.7	362.8	4.74	66	4.94	0.98	2.8	0.99	4.12	65
319	1	36	130	90	68	0	0	0	0	1	1	0	0	5.34	10.68	4.69	1.13859	1	38	43.1	10.2	553	5.43	81	10.99	4.89	4.29	0.74	6.39	57
320	1	41	112	74	82	0	0	1	0	1	1	1	1	5.32	8.05	2.05	2.59512	3	125	0.107	2.3	386.1	4.35	70	5.81	2.16	3.26	1.08	5.01	59
321	1	30	152	103	70	1	0	0	0	2	1	0	0	5.32	7.78	1.88	2.82979	3	88	1773.9	6.4	294.5	7.54	81	6.75	2.61	4.1	0.67	5.7	55
322	1	44	121	87	102	1	0	1	1	3	1	0	0	5.31	7.34	1.47	3.61224	3	15	11.6	5.3	298.1	8.01	88	6.53	0.97	2.53	1.03	4.05	48
323	1	39	138	97	80	1	0	1	0	3	1	0	0	5.31	8.41	2.58	2.05814	1	6	4.7	1.9	462.5	5.89	98	13.68	2.14	1.6	0.82	3.06	57
324	1	37	173	114	85	1	0	1	0	1	1	0	0	5.29	9.67	3.08	1.71753	2	89	5313.2	55.7	253.5	4.81	61	5.36	0.92	2.32	2.2	4.75	60
325	1	43	108	86	66	0	1	0	0	1	1	0	0	5.29	7.77	1.8	2.93889	3	94	28.2	75.1	298	5.47	60	15.73	2.45	6.12	0.97	7.99	36
326	1	36	141	98	79	0	0	1	1	3	1	0	0	5.28	7.57	1.69	3.12426	1	8	26678	146	379	6.16	71	25.08	9.09	4.74	0.88	7.42	37
327	1	35	196	138	87	0	0	1	0	1	1	0	0	5.24	10.14	3.62	1.44751	3	106	1.11	3.7	245.4	4.15	62	11.22	1.28	2.44	1.1	3.72	55
328	1	35	196	138	87	0	0	0	0	1	1	0	0	5.24	10.14	3.62	1.44751	3	118	77.8	0.9	257.5	4.7	67	6.42	3.38	3.37	0.83	4.87	59
329	1	34	134	85	90	1	1	1	0	3	1	0	0	5.22	8.61	2.71	1.9262	3	63	0.05	1.7	528.5	3.71	81	10.95	2.44	3.56	1.05	5.13	60
330	1	28	120	72	70	0	0	0	0	1	1	0	0	5.2	8.2	2.4	2.16667	3	25	18.8	80	401.1	5.09	73	7.22	2.54	2.52	0.88	3.89	55
331	1	43	144	100	67	1	0	0	0	1	1	0	0	5.16	8.88	3.02	1.70861	2	56	6.3	1.2	421.6	4.74	68	7.47	5.9	2.53	0.83	5.07	60
332	1	23	146	82	66	1	0	0	0	1	1	0	0	5.15	8.31	2.3	2.23913	1	16	2443.3	77	436.6	5.81	85	5.39	1.63	5.17	1.13	6.97	57
333	1	38	168	114	99	1	0	0	0	1	1	1	0	5.14	9.15	3.17	1.62145	2	50	336.8	2.2	620	4.25	72	5.36	3.78	4.42	1.22	6.35	60
334	1	33	134	96	77	1	1	1	0	3	1	0	0	5.14	9.07	2.52	2.03968	3	22	0.05	1	350.9	3.24	62	5.8	2.4	2.65	0.82	4.08	59
335	1	35	156	104	72	1	0	1	1	3	2	0	0	5.1	8.08	2.333	2.18603	1	24	0.05	1	217.4	6.45	76	7.87	14.64	2.75	0.54	7.84	48
336	1	38	126	97	71	1	0	1	0	1	1	0	0	5.07	9.51	3.62	1.40055	1	37	421.7	23.7	378.6	5.35	70	8.36	5.82	2.46	0.67	4.81	58
337	2	45	145	94	84	0	0	1	0	3	1	0	0	5.07	9.14	3.52	1.44034	0	0	2.1	1.6	258.8	5.41	82	14.91	1.26	4.68	1.15	6.38	61
338	2	37	145	99	77	0	0	0	0	3	2	0	0	5.05	8.96	3.02	1.67219	1	16	798.5	1.6	452.3	4.84	101	6.44	1.28	4.4	0.64	5.63	55
339	1	40	108	81	71	1	0	0	0	1	1	0	0	5.05	10.13	4.44	1.13739	3	81	0.45	12.3	362.1	4.36	80	4.22	1.46	4.76	0.82	5.97	50
340	1	32	129	78	91	1	0	0	0	2	1	0	0	5.04	7.64	1.97	2.55838	3	92	939.2	11	409.8	5.22	80	7.21	2.56	3.1	1.01	4.84	60
341	1	44	123	76	91	1	0	0	0	2	1	0	0	5.04	7.79	2.08	2.42308	2	42	14.153	98	484.4	5.97	57	4.69	3.24	2.13	0.82	3.84	55
342	1	34	147	100	78	1	0	0	0	1	1	0	0	5.03	7.41	1.89	2.66138	2	34	2.3	0.6	401.4	5.53	71	4.97	2.18	3.71	0.76	5.24	60
343	1	32	154	111	87	1	0	0	0	3	1	0	0	5.02	9.5	3.8	1.32105	2	18	21.8	2.2	547.2	7.32	88	11.44	2.49	4.67	1.11	6.32	60
344	1	37	183	110	76	1	0	0	0	1	1	0	0	4.99	12.49	6.6	0.756061	2	41	26632.6	127.9	427.8	5.3	91	6.64	1.43	3.93	0.75	5.15	51
345	1	33	139	98	63	1	0	0	0	3	2	0	0	4.99	8.78	2.85	1.75088	1	16	0.119	17.661	307.5	5.95	72	3.9	6.22	4.19	0.97	7.25	53
346	1	45	153	111	90	0	1	1	0	3	1	0	0	4.95	6.94	1.58	3.13291	3	69	2.2	1.2	333.3	4.79	68	4.3	0.73	1.75	1.22	3.14	60
347	1	42	131	91	68	1	1	0	0	3	2	0	0	4.93	8.27	2.31	2.1342	2	10	53.4	1.4	269.8	5.98	65	10.7	4.32	3.01	0.79	4.95	60
348	1	41	132	99	87	0	0	1	0	3	1	0	0	4.93	6.64	1.32	3.73485	1	10	18.42	3.26	814.3	5.21	102.1	5.18	2.27	4.34	0.89	5.76	57
349	1	43	148	92	72	1	0	0	0	3	1	0	0	4.88	7.94	2.46	1.98374	1	64	0.08	2.8	271.2	2.52	54	5.62	2.11	3.8	1.05	5.58	60
350	1	33	127	92	78	0	0	0	1	2	1	0	0	4.87	7.39	1.95	2.49744	1	45	7.9	5.2	319.7	6.31	89	6.78	3.72	3.67	0.84	5.55	57
351	1	40	128	91	60	1	1	0	0	1	1	0	0	4.87	10.43	4.67	1.04283	1	80	112.5	76.9	668.6	4.15	55	6.03	0.81	1.73	0.81	2.87	58
352	1	31	98	70	103	0	0	0	1	2	1	0	0	4.87	7.39	1.95	2.49744	2	43	20.4	3.4	357.4	4.26	69	8.16	2.82	1.71	0.74	3.17	57
353	1	32	125	70	80	1	0	0	0	3	1	0	0	4.85	8.97	3.06	1.58497	2	5	19.7	2	292.8	3.4	68	6.03	1.7	4.38	0.84	5.71	50
354	1	36	166	116	114	0	0	0	0	1	1	0	1	4.84	7.37	1.94	2.49485	2	56	89.5	3.8	285.8	6.12	71	4.63	1.91	3.43	0.78	4.89	60
355	1	34	166	116	114	1	0	0	0	1	1	0	0	4.84	7.37	1.94	2.49485	2	88	25373	300	131.1	7.26	72	9.96	0.66	3.37	0.61	4.29	59
356	1	37	138	107	109	0	0	1	1	1	1	0	0	4.83	7.2	1.92	2.51562	2	80	8.7	1.4	513.6	4.8	87	4.65	5.7	3.66	0.69	5.98	45
357	1	39	157	104	65	1	0	0	0	2	1	0	0	4.81	8.11	2.61	1.84291	1	4	425.6	5.8	252.7	5.41	56	27.58	3.27	2.72	0.73	4.43	58
358	2	45	129	85	49	1	1	0	0	3	1	0	0	4.79	7.79	2.34	2.04701	0	0	599.1	7.9	275.4	4.07	66	8.39	8.74	0.77	0.5	3.45	58
359	1	33	125	75	85	0	0	0	0	1	1	0	0	4.76	7.52	2.16	2.2037	1	48	18.6	1.5	496.3	7.09	95	6.34	3.14	1.59	0.71	3.24	58
360	1	35	153	90	119	1	1	0	1	2	1	0	0	4.75	8.47	3.13	1.51757	3	164	32	2.5	492.6	5.41	98	5.98	2	3.8	0.79	5.27	60
361	1	45	143	107	94	1	0	1	0	3	1	0	0	4.72	6.47	1.24	3.80645	1	3	15.8	3	400.9	5.95	80	9.2	5.48	4.11	0.8	6.42	45
362	2	45	120	81	55	0	0	1	0	1	1	0	0	4.71	8.07	2.71	1.73801	1	2	1.6	1.3	388.1	3.11	49	6.09	1.75	1.06	1.21	2.66	60
363	1	37	112	90	65	0	0	0	0	1	1	0	0	4.71	7.45	2.07	2.27536	2	35	1.3	1.5	517.5	4.4	80	5.11	4.69	3.16	0.66	5.17	60
364	1	42	128	74	67	1	1	0	0	1	1	0	0	4.7	7.23	2.03	2.31527	2	55	29.4	1	478.4	3.96	74	8.49	2.05	4.38	0.65	5.97	60
365	1	33	138	69	92	1	0	0	0	1	1	0	0	4.69	6.83	1.57	2.98726	1	19	188	2.6	500.9	6.56	95	6.17	2.37	4.66	1.08	6.15	56
366	1	33	101	62	84	1	1	0	0	1	1	0	0	4.67	6.57	1.53	3.05229	2	32	412.7	5	600.6	4.7	72	4.88	1.41	3.35	0.93	4.68	60
367	1	39	103	63	76	0	0	0	0	1	2	0	0	4.66	7.55	2.01	2.31841	3	54	25373	295	293.2	7.07	63	4.83	2.26	5.84	1.27	7.44	40
368	1	43	165	97	60	1	1	1	0	3	2	0	0	4.65	6.58	1.4	3.32143	3	52	1789.7	20	432.9	4.87	80	4.23	3.28	2.92	0.8	4.61	60
369	1	32	165	119	75	1	0	0	0	1	1	1	0	4.65	7.66	2.42	1.92149	2	39	9630.3	47.8	466.3	5.82	74	4.5	13.39	1.16	0.51	4.79	65
370	1	38	160	95	85	1	1	1	0	3	1	1	0	4.63	6.41	1.22	3.79508	3	64	1.9	1.5	361.4	6.13	76	13.88	1.55	3.1	1	4.5	55
371	1	43	132	78	92	0	0	0	0	3	1	0	0	4.62	6.67	1.56	2.96154	3	39	49	1.2	416.4	4.94	73	5.51	2.07	3.7	1.03	5.55	60
372	1	40	150	90	102	1	0	0	1	1	1	1	1	4.61	8.77	3.21	1.43614	3	117	0.01	2.3	498.4	3.67	73	7.51	2.5	2.74	0.88	4.12	59
373	1	35	110	72	89	0	0	1	0	1	1	0	0	4.6	7.19	1.9	2.42105	1	32	78	301	465.9	3.13	76	6.15	0.71	4.01	1.12	5.22	44
374	1	44	123	77	68	0	0	0	0	3	1	0	0	4.6	7.31	2.2	2.09091	3	8	0.27	9.9	395.8	5	88	5.47	3.61	2.65	0.73	4.07	60
375	1	42	119	84	88	1	0	0	0	1	1	0	0	4.58	6.72	1.74	2.63218	1	13	1.26	8.1	485	5.74	53	11.88	9.23	2.09	0.7	5.22	58
376	1	43	123	85	68	1	0	0	0	3	1	0	0	4.56	7.97	2.67	1.70787	1	2	0.16	19.9	432.8	6.03	79	6.77	1.57	4.68	1.25	5.96	58
377	1	43	125	78	81	1	1	0	1	1	1	0	0	4.55	7.73	2.66	1.71053	2	91	0.05	2.1	496.7	4.08	92	7.57	1.67	5.21	1.03	6.37	60
378	1	44	123	80	78	0	0	0	1	3	1	0	0	4.54	7.11	1.67	2.71856	3	230	0.24	22.2	323.6	3.33	64	6.95	1.84	2.97	0.97	4.35	60
379	1	32	149	100	85	1	1	0	0	1	1	0	0	4.53	9.49	4.13	1.09685	1	32	0.39	10.7	299.5	6.13	71	11.83	4.84	3.07	0.94	5.4	60
380	1	40	150	111	86	0	0	0	0	1	1	0	0	4.52	6.47	1.36	3.32353	1	49	3.44	51.2	493.9	4.11	69	12.11	2.06	5.21	1.44	7.35	40
381	1	44	156	78	92	0	0	0	0	1	1	0	0	4.49	7.83	2.56	1.75391	1	55	5.83	58.2	221.6	3.66	51	5.7	3.36	3.53	0.76	5.02	60
382	1	33	178	111	105	0	0	1	0	3	2	0	0	4.49	7.74	2.76	1.62681	1	12	3.15	102.3	334.6	4.41	69	5.75	3.74	6.17	0.86	8.44	60
383	1	31	130	80	75	1	0	1	0	1	1	0	0	4.48	7.02	1.72	2.60465	2	28	299	10.9	492.4	5.72	103	6.03	3.64	3.79	0.82	5.6	55
384	1	34	133	89	79	0	0	1	0	3	1	0	0	4.48	7.71	2.66	1.68421	3	57	1254.6	35.9	312	4.55	70	5.26	1.33	3.1	1.02	4.3	55
385	1	35	107	66	72	1	1	0	0	2	1	0	0	4.46	8.87	3.06	1.45752	1	16	585.2	4.4	220.7	3.85	63	5.66	1.48	2.52	0.69	3.57	58
386	1	44	107	75	75	1	0	0	0	3	1	0	0	4.45	6.8	1.4	3.17857	2	16	113.4	4.9	415.8	3.99	67	5.81	1.74	3.33	1.04	4.8	52
387	1	37	143	103	80	0	1	1	0	3	1	0	0	4.43	7.25	1.93	2.29534	1	12	3.81	0.76	194.8	4.9	52.1	5.51	1.03	2.51	1.02	3.67	58
388	1	43	97	71	74	1	0	1	1	1	1	0	0	4.42	7.43	2.36	1.87288	1	1	216.8	21.67	453.32	3.94	43.58	4.6	1.86	3.93	0.91	5.45	35
389	1	45	128	100	85	1	0	0	0	3	1	0	0	4.4	7.55	2.48	1.77419	2	14	4.57	0.378	304.09	4.44	54.97	8.08	4.02	3.25	0.71	5.25	60
390	1	33	130	80	75	1	0	1	0	1	1	0	0	4.37	5.79	1.03	4.24272	3	20	59.76	12.01	368.9	6.31	59	5.46	3.98	2.11	0.68	3.54	55
391	1	33	153	106	59	1	0	0	1	1	1	0	0	4.37	10.07	5.08	0.860236	1	35	2804	28.1	334	5.89	91.7	6.81	1.31	3.36	0.85	4.62	46
392	1	37	153	104	84	0	0	0	1	1	1	0	0	4.35	7.73	2.73	1.59341	3	42	7.65	2.4	464.6	6.65	70.8	12.53	1.65	2.36	0.86	3.56	64
393	1	39	145	100	99	0	1	0	0	2	1	0	0	4.31	6.52	1.59	2.71069	3	45	4.43	0.85	401.7	5.52	46.8	7.05	4.54	1.51	1.62	4.86	64
394	1	33	113	68	72	1	1	1	0	3	1	0	0	4.28	6.1	1.3	3.29231	2	25	4.46	0.57	272.9	6.61	51.9	4.96	3.28	2.76	0.99	4.42	58
395	1	44	125	75	62	1	0	0	0	3	1	0	0	4.25	6.96	2.01	2.11443	1	13	33.73	1.31	425	4.6	58.4	4.63	2.59	3.31	0.73	4.84	56
396	1	42	131	83	76	1	1	1	1	3	1	0	0	4.25	6.22	1.26	3.37302	3	78	4.31	1.54	486.8	4.34	63.2	3.41	3.12	3.96	1.47	6.03	59
397	1	43	126	93	76	1	0	0	0	3	1	0	0	4.23	7.45	1.93	2.19171	3	41	5.88	1.5	246.1	3.18	52.7	5.16	1.9	4.19	1.51	6	56
398	1	37	138	83	62	0	1	1	1	2	1	0	0	4.19	7.73	2.96	1.41554	3	74	8.25	1.08	379.9	6.1	107.2	8.17	3.29	2.45	0.96	4.19	60
399	1	34	120	84	81	1	0	0	0	1	1	1	0	4.18	8.76	3.85	1.08571	2	84	35.56	1.35	481.9	5.56	105.4	7.76	1.41	4.97	0.89	6.23	55
400	1	44	147	102	69	0	0	1	0	1	1	0	0	4.17	7.84	2.7	1.54444	3	66	149	25.94	478	5.43	94.4	4.16	2.36	0.59	1	2.36	58
401	1	44	166	97	81	1	0	1	0	1	1	0	0	4.15	8.36	3.09	1.34304	1	32	3	0.85	474.2	3.9	63.1	4.05	4.58	3.39	1.07	5.57	55
402	1	34	130	85	70	0	0	0	0	3	1	0	0	4.15	5.81	1.27	3.26772	2	7	14.77	1.92	448.6	5.07	84.7	6.14	1.65	3.4	0.86	4.9	55
403	1	39	127	86	86	1	0	0	0	1	1	1	0	4.12	7.11	2.51	1.64143	3	67	14.69	0.836	529.8	3.86	73.6	5.72	1.14	3.61	1.11	4.88	64
404	1	39	170	120	93	1	0	0	0	1	1	0	0	4.06	6.36	1.81	2.24309	2	71	3.71	1.6	292.79	5.01	77.53	4.95	1.39	2.78	1.17	4.26	56
405	1	38	130	86	62	1	0	1	1	1	1	0	0	4.06	6.31	1.82	2.23077	2	24	6.83	1.51	329.9	7.5	72.5	5.84	3.38	3.11	0.96	4.89	56
406	1	42	166	97	59	1	0	1	0	3	2	0	0	4.04	6.74	2.09	1.93301	3	32	3	1.14	263.3	2.86	53.2	5.4	0.6	1.43	1.55	3.09	58
407	1	34	131	75	75	1	0	0	0	3	1	0	0	4.04	7.71	2.82	1.43262	1	10	8.17	2.04	396.8	3.92	60.7	8.48	3.46	4.62	0.86	6.39	62
408	2	42	129	73	65	0	0	0	1	3	1	0	0	4.03	6.18	1.75	2.30286	1	12	3	0.52	557.2	3.29	78.1	6.51	5.99	2.74	0.81	4.74	61
409	1	41	183	130	63	1	0	0	0	2	1	0	0	4	6.72	2.03	1.97044	3	79	14.05	1.44	311.8	4.68	81.2	4.94	1.67	3.86	1.5	5.47	58
410	1	42	150	108	89	1	0	1	1	1	1	0	0	3.99	7.07	2.62	1.5229	2	39	5895	206.4	368.22	5.17	67.66	7.21	2.03	4.17	1.03	5.65	56
411	1	37	136	90	74	0	0	0	0	3	2	0	0	3.95	6.16	1.65	2.39394	2	61	361.7	2.92	470.8	5.26	84.6	11.9	3.07	3.64	0.88	5.75	58
412	1	35	132	79	79	0	0	0	0	1	1	0	0	3.95	6.91	2.61	1.51341	2	84	12.5	3.06	596.83	5.99	99.2	6.39	4.25	3.65	0.99	5.43	54
413	1	38	145	93	83	0	0	0	0	1	1	1	0	3.94	7.46	2.64	1.49242	1	48	454	4.15	411.5	3.63	54.7	5.96	7.92	2.11	0.75	4.88	53
414	2	41	156	114	82	0	0	1	0	3	1	0	0	3.91	6.54	2.22	1.76126	3	48	316.8	123.4	361.5	6.12	72.6	6.44	1.66	5.1	1.26	6.8	62
415	1	34	112	93	70	1	0	0	0	1	1	0	0	3.89	7.48	2.95	1.31864	2	50	4.13	1.52	523.92	3.92	74.68	8.34	0.43	2.45	1.21	3.8	58
416	1	35	150	81	81	1	1	1	1	3	2	0	0	3.87	8.06	3.71	1.04313	2	50	51.43	6.01	451.88	3.46	59.82	15.29	8.14	3.39	0.88	6.77	60
417	1	37	120	80	73	1	1	0	0	2	1	0	0	3.86	6.41	1.87	2.06417	3	50	3.91	0.73	475.57	6.88	60.11	6.81	2.57	3.72	1.66	5.88	60
418	1	44	130	88	67	0	0	1	1	3	1	0	0	3.85	5.86	1.65	2.33333	3	38	12.5	3.06	596.83	5.99	99.2	6.39	4.25	3.65	0.99	5.43	54
419	1	36	159	89	86	1	0	1	0	3	1	0	0	3.84	7.07	2.71	1.41697	1	3	2082	118.9	237.8	4.48	56.9	6.51	1.48	3.31	1.86	5.48	52
420	1	31	114	83	84	1	0	0	0	2	1	0	0	3.84	6.76	2.25	1.70667	3	90	37.73	1.46	316.46	6.21	51.11	18.59	1.44	2.9	1.03	4.3	53
421	2	41	142	98	79	0	1	0	0	2	1	1	0	3.81	5.99	1.72	2.21512	1	4	11.5	1.31	451.1	5.31	84.4	6.31	3.18	3.48	0.97	5.18	59
422	1	41	132	90	66	1	1	0	0	1	1	0	0	3.77	8.77	3.99	0.944862	3	22	28.03	4.19	312.2	6.29	73.3	8.89	3.37	3.07	0.83	4.9	60
423	1	35	154	100	73	0	0	1	1	3	2	0	0	3.74	6	1.78	2.10112	3	70	19.5	1.54	446.7	6.56	88.9	10.68	3.92	2.88	0.79	4.28	60
424	1	34	121	77	80	1	0	0	0	3	1	0	0	3.73	8.32	3.22	1.15839	3	8	5.78	2.05	300.9	4.99	62.3	4.56	2.14	3.33	0.99	5.1	61
425	1	24	130	82	65	1	0	0	0	3	2	0	0	3.62	5.73	1.7	2.12941	1	40	4.67	1.22	287.9	4.25	59.3	4.65	1.82	2.64	1.14	4.31	58
426	1	34	124	89	78	0	0	0	0	1	1	0	0	3.62	6.53	2.39	1.51464	2	42	5.65	2.05	372.2	6.05	76.4	4.93	1.27	3.59	1.11	4.81	60
427	1	36	142	97	65	1	1	1	0	1	1	0	0	3.61	10.46	4.55	0.793407	1	24	3.87	1.04	327.3	3.96	55.5	6.03	2.41	2.34	1.52	4.06	58
428	1	43	133	90	67	1	0	1	1	3	1	0	0	3.58	5.95	2.03	1.76355	1	5	4.2	0.81	296.5	4.44	56.1	5.95	2.24	2.74	1.02	4.44	62
429	1	42	125	80	64	1	0	0	0	1	1	0	0	3.58	6	1.88	1.90426	1	3	7.1	0.7	363.9	4.33	95.7	6.36	1.8	4.11	1.15	5.76	66
430	1	45	122	76	75	0	0	0	0	3	1	0	0	3.56	5.36	1.44	2.47222	1	9	5.62	1.15	333.6	4.25	64.6	6.33	2.46	3.79	1.04	5.25	58
431	1	46	175	100	76	0	0	0	1	1	1	0	0	3.49	5.06	1.12	3.11607	3	40	5.16	0.93	290.6	2.28	45.8	8.84	0.73	1.65	1.31	3.12	60
432	1	44	134	95	58	0	0	0	1	2	1	0	0	3.41	5.17	1.3	2.62308	3	41	3.99	2.23	311.8	4.89	85.6	5.39	3.45	2.02	0.73	3.77	62
433	1	36	120	78	88	0	0	0	1	3	1	0	0	3.41	5.7	1.7	2.00588	1	5	3	0.3	257.3	2.57	55.5	4.36	1.4	2.57	1.49	4.15	60
434	1	44	138	78	78	1	0	1	0	3	1	0	0	3.35	5.61	1.79	1.87151	1	5	28.03	4.19	312.2	6.29	73.3	4.07	3.37	3.07	0.83	4.9	60
435	1	38	152	74	95	0	0	1	0	3	1	0	0	3.32	5.06	1.43	2.32168	1	1	110.6	14.69	287.5	5.62	87.1	16.13	2.58	6.22	1.25	8.08	57
436	1	33	157	106	65	1	1	1	0	3	1	0	0	3.29	5.06	1.31	2.51145	2	34	47.94	1.8	382.7	6.49	76.5	5.78	13.5	2.48	0.77	5.97	57
437	1	45	113	79	69	1	1	0	0	3	1	0	0	3.28	5.6	1.92	1.70833	1	7	40.93	1.87	422.8	5.44	55.7	13.85	1.26	5.08	1.09	6.51	55
438	1	28	139	83	83	1	0	0	1	3	2	0	0	3.17	5.36	1.48	2.14189	1	12	93.38	5.52	476.6	6.03	70.4	6.8	1.04	4.04	1.42	5.52	58
439	1	36	150	100	84	1	1	0	0	1	1	0	0	3.16	6.83	3.11	1.01608	3	67	15.26	1.9	545.5	3.84	95.3	4.88	1.92	3.82	0.62	5	50
440	1	40	172	114	62	1	1	1	0	3	2	0	0	3.15	5.84	1.78	1.76966	2	12	56.75	2.6	578.8	4.29	83.2	11.9	1.19	2.95	1.02	4.12	36
441	1	39	146	106	83	0	0	0	0	1	1	0	0	3.14	7.01	3.29	0.954407	3	40	42.28	2.3	430.8	4.69	80.4	10.9	1.43	3.83	1.04	5.03	40
442	1	42	146	96	79	1	0	1	0	3	1	0	0	3.12	5.5	1.73	1.80347	3	53	7.89	0.898	320.2	4.02	88.2	6.07	1.75	3.96	1.07	5.22	50
443	1	43	129	85	86	1	1	0	0	2	1	0	0	3.1	6.4	2.67	1.16105	1	48	52.1	1.76	493.7	3.93	85.4	5.66	2.67	2.65	0.77	4.13	57
444	1	44	133	86	69	0	0	1	0	3	1	0	0	3.04	8.65	0.85	3.57647	1	3	57.28	16.5	350.4	6.59	51.6	4.4	0.53	3.27	1.09	4.5	59
445	1	39	131	89	74	1	1	1	1	3	1	0	0	3.04	4.96	1.15	2.64348	2	5	722.3	1.1	554.3	7.76	47	9.14	3.28	3.98	0.74	5.38	54
446	1	37	150	109	97	0	1	1	0	3	1	0	0	3.03	7.5	3.25	0.932308	0	0	25.03	0.9	478.3	10.67	111	8.98	4.81	3.22	0.83	4.79	62
447	2	41	150	115	106	0	0	1	0	3	1	0	0	3.03	5.97	2.34	1.29487	2	13	411.8	104.8	502.6	4.52	95.9	6.87	0.96	3.71	1.29	5.04	59
448	1	44	105	82	97	1	0	1	0	3	1	1	0	3.02	5.51	1.79	1.68715	3	93	23.4	1.49	436.8	4.43	71.6	4.19	2.36	5.03	0.75	6.48	57
449	1	24	138	79	71	0	0	0	0	3	1	0	0	2.97	4.83	1.5	1.98	1	2	103.6	4.08	567.6	8.11	96.9	27.29
450	1	42	140	98	60	0	0	0	0	3	1	0	0	2.92	5.97	2.57	1.13619	3	29	3.4	1.3	298.9	4.68	68	4.47	8.86	3	0.79	5.48	60
451	1	43	113	79	63	1	0	0	0	3	1	0	0	2.91	5.23	1.76	1.65341	1	11	386.4	59.2	548.5	3.87	81.4	10.8	1.29	4.87	1.09	6.39	53
452	1	26	164	90	84	0	0	1	0	3	2	0	0	2.85	4.24	1.13	2.52212	1	7	230.2	12.2	575.7	6.18	67.3	9.45	1.29	4.1	1.16	5.36	39
453	1	43	138	95	68	0	0	0	0	3	1	0	0	2.8	4.89	1.67	1.67665	2	5	33.73	1.64	480.2	4.76	56.6	6.57	2.96	3.81	1.44	5.54	57
454	1	38	128	100	71	1	0	0	0	3	1	0	0	2.8	5.99	2.67	1.04869	1	3	10.28	1.54	349.9	5.71	94.7	7.72	1.05	2.83	1.43	4.44	58
455	1	45	106	75	72	0	0	0	0	3	1	0	0	2.76	4.38	1.24	2.22581	1	7	30.47	3.4	649	6.38	135	3.79	3.62	2.62	0.77	4.19	54
456	1	45	120	65	70	0	0	1	0	3	1	0	0	2.67	4.95	1.82	1.46703	1	28	25.65	6.13	344.9	4.08	52.6	20.38	5.55	3.01	1.05	5.96	45
457	1	45	138	88	76	1	0	1	0	3	1	0	0	2.65	6.03	2.72	0.974265	2	24	8.14	1.8	381	5.04	75.2	3.98	1.32	3.87	1.22	5.28	56
458	1	44	128	78	74	0	0	0	0	3	1	0	0	2.61	5.25	1.94	1.34536	3	43	437.3	130.7	357.2	6.28	56.9	7.41	1.41	3.72	1.01	5.08	57
459	1	41	132	91	81	0	0	0	0	3	1	0	0	2.04	3.91	1.41	1.44681	2	12	13.34	2.1	451.1	5.56	52.1	8.9	2.03	4.69	1.42	6.36	51
460	1	43	156	104	100	1	0	0	0	3	1	0	0	1.76	3.3	1.14	1.54386	0	0	33.73	1.64	480.2	4.76	56.6	6.57	2.96	3.81	1.44	5.54	57
461	2	42	163	100	74	0	1	1	1	2	2	1	1	6.42	7.62	0.87	7.37931	3	112	357	54.18	256.2	4.77	50.01	14.73	3.66	5.89	1.02	7.84	43
462	1	31	118	62	57	1	0	1	0	2	1	0	0	19.89	23.34	2.22	8.95946	2	35	35.02	9.03	294.88	7.25	78.52	5.07	1.19	3.8	1.6	5.87	60
463	1	45	121	72	75	0	0	1	0	3	1	0	0	4.09	6.43	1.85	2.21081	1	42	6.02	1.39	511.3	3.24	79.4	5.54	2.85	2.03	1	3.99	54
464	1	37	135	93	70	1	1	1	0	2	1	0	0	10.36	12.76	1.85	5.6	3	42	83.57	11.87	503	5.36	75.3	3.7	0.81	4.25	1.74	6.06	55
465	1	38	106	68	72	1	1	0	0	2	1	0	0	6.38	7.97	1.08	5.90741	1	5	52.59	3.32	393	5.28	70.5	5.61	0.52	3.12	1.27	4.64	53
466	1	44	120	75	55	1	0	0	1	2	2	1	1	15.1	17.44	1.57	9.61783	3	122	1470	164	402.1	4.64	79.39	16.3	1.76	4.23	1.1	5.4	45
467	1	40	109	72	67	1	0	0	0	2	1	0	0	14.22	15.89	1.06	13.4151	2	50	19.84	0.826	407.7	5.44	56.5	7.62	1.1	3.84	0.97	5.14	53
468	1	43	115	68	54	1	0	0	0	2	1	0	0	9.19	10.8	1.07	8.58879	2	20	153.5	52.08	434.1	8.25	76.9	5.09	0.98	2.63	0.88	3.82	63
469	1	42	105	74	101	0	0	0	0	2	1	0	0	7.6	10.9	2.15	3.53488	2	66	309.9	6.59	431.3	4.55	83	5.27	2.01	2.5	0.8	4.1	53
470	1	38	143	95	68	1	1	0	0	2	1	0	0	7.18	10.07	2.23	3.21973	2	18	20.85	3.88	405	4.24	61.7	11.46	2.43	4.98	1.31	7.17	65
471	1	41	127	83	72	0	0	1	0	2	1	0	0	6.48	8.31	1.4	4.62857	1	42	153	12.61	306.9	3.52	41.87	6.48	1.04	3.78	1.38	5.75	58
472	1	34	145	89	78	1	0	1	0	2	1	0	0	8.78	12.54	2.62	3.35115	2	18	331.4	36.17	438.5	5.17	93.4	5.39	1.39	3.96	1.05	5.66	62
473	1	44	105	66	89	1	0	1	0	1	2	0	1	4.89	9.43	3.83	1.27676	2	66	9.72	1.13	520.32	5.35	86.85	7.61	5.4	3.73	0.83	5.84	50
474	1	43	133	98	92	1	1	1	0	1	2	1	1	3.73	7.89	3.44	1.0843	2	32	21.12	1.55	558.39	7.29	88.28	8.16	14	1.85	0.69	4.53	44
475	1	35	142	98	81	1	0	0	0	1	2	1	0	10.86	12.53	1	10.86	1	24	35.75	2.25	399.19	3.24	70.95	7.64	2.53	1.77	0.62	3.36	46
476	1	32	108	77	93	1	0	0	0	1	1	0	0	17.32	19.06	1.11	15.6036	2	7	228.1	33.37	332.34	5.76	74	9.88	16.49	1.26	0.53	6.05	59
477	1	36	160	115	79	1	0	0	0	1	1	0	0	5.34	7.7	2.06	2.59223	3	55	26.66	2.48	389.89	8.83	67.75	21.02	5.18	3.49	0.86	5.63	50
478	1	45	153	102	85	0	0	0	0	1	1	0	0	4.6	6.59	1.41	3.26241	1	48	16.33	1.22	383.79	6.65	54.27	6.22	1.94	4.9	1.29	6.24	61
479	1	35	157	93	73	1	0	1	1	1	1	0	0	3.11	4.84	1.35	2.3037	2	16	475.7	27.86	404.47	6.26	66.22	7.69	3.18	4.54	1.1	6.49	57
480	1	37	160	85	90	1	0	0	0	1	2	1	1	6.41	7.96	1.06	6.04717	3	116	313.4	64.89	621.8	8.22	59.46	6.11	12.77	5.02	1	9.76	35
481	1	37	113	79	90	1	0	0	0	1	1	1	0	7.69	10.06	1.57	4.89809	3	48	65.59	3	390.6	6.63	69.24	18.65	2.1	3.54	0.9	4.55	43
482	1	43	138	85	82	1	0	0	1	1	1	1	0	5.44	8.79	2.69	2.0223	3	83	5.44	1.16	353.11	5.93	45.93	16.01	1.87	3.01	1.04	4.41	47
483	1	37	126	78	77	1	0	0	0	1	1	1	1	18.12	20.54	1.7	10.6588	1	20	10000	300	284.21	1.32	41.67	6.77	1.3	2.11	0.9	3.37	36
484	1	44	157	104	74	0	0	1	1	3	1	0	0	5.44	8.78	2.56	2.125	3	34	26.8	2.83	449.7	5.1	75.6	10.46	1.28	2.7	1.25	4.28	60
485	1	40	85	43	48	1	0	1	1	1	4	0	1	16.43	23.06	5.51	2.98185	3	144	38.35	3.56	443.18	9.49	98.28	12.23	1.23	2.38	1.1	3.76	59
486	1	36	122	83	73	1	0	1	0	3	1	0	0	2.91	5.94	2.47	1.17814	2	6	4.26	1.12	357.1	5.1	80.1	6.78	3.56	3.69	1.12	5.19	60
487	1	45	170	111	60	0	0	1	0	3	1	0	0	3.28	4.75	1.07	3.06542	1	12	21.03	3.11	348.5	5.49	65.7	5.2	4.13	2.46	1.04	4.13	60
488	1	39	159	94	77	1	1	1	0	3	1	0	0	3.95	6.01	1.63	2.42331	2	34	16.14	1.5	394.3	5.77	59.4	4.89	3.12	0.91	2.28	4.69	65
489	1	41	133	88	71	1	0	0	0	3	1	0	0	6.37	8.12	1.26	5.05556	1	3	8.09	1.92	392.9	5.78	66.9	5.44	0.93	3.06	1.44	4.53	63
490	1	42	105	74	101	0	0	0	0	2	1	0	0	7.6	10.9	2.15	3.53488	2	66	309.9	6.59	431.3	4.55	83	5.27	2.01	2.5	0.8	4.1	53
491	1	25	130	80	74	0	0	0	1	1	1	0	0	11.25	13.8	1.79	6.28492	3	65	17.91	1.24	192.69	4.29	51.16	13.64	1.01	5.21	1.03	6.26	53
492	1	38	145	100	110	1	0	1	0	1	1	0	0	6.39	9.38	2.08	3.07212	2	52	20.47	1.47	281.5	4.53	72.9	6.51	2.46	2.88	0.83	4.74	53
493	1	31	130	80	74	1	0	0	1	1	1	0	0	8.22	9.88	1.24	6.62903	2	45	5.38	1.29	349.84	5.82	53.43	9.28	1.82	2.95	0.72	4.27	55
494	1	36	125	85	56	1	0	0	0	1	1	0	0	4.05	9.16	4.53	0.89404	3	50	3.89	0.995	330.4	4.78	65.75	6.51	1.61	3.25	0.76	4.58	56
495	1	41	150	96	74	0	0	1	0	1	1	0	0	4.47	9.55	4.15	1.07711	2	38	27.18	2.28	422.22	6.41	96.07	9.48	0.7	4.23	1.19	5.91	55
496	1	45	108	75	60	1	0	0	0	1	1	0	0	11.4	15.02	2.69	4.23792	1	11	5.48	1.1	266.2	4.25	59.8	7.75	0.52	3.54	1.31	5.06	61
497	1	33	134	101	66	0	0	0	0	1	1	0	0	4.96	8.77	3.1	1.6	2	62	5.14	1.17	445.6	4.35	74.5	5.56	1.82	2.45	0.85	3.96	57
498	1	35	142	87	78	1	0	0	0	1	1	0	0	6.49	10.31	2.86	2.26923	2	52	346.1	3.86	344.2	5.5	88.6	4.78	1.11	3.45	0.87	4.67	62
499	1	45	135	96	78	1	0	0	0	2	1	0	0	6.26	8.4	1.57	3.98726	2	61	470.3	13.98	360.5	4.42	75.5	5.71	3.19	3.66	0.82	5.62	60
500	1	42	131	87	81	1	0	1	0	3	1	0	0	4.49	6.71	1.63	2.7546	2	27	42.73	2.75	340.2	5.07	72.6	4.63	6.31	2.86	1.08	6.04	63
501	1	44	153	96	81	0	0	1	0	2	1	0	0	4.82	8.72	3.23	1.49226	3	45	110.3	7.55	275.7	5.05	73.9	8.27	1.42	1.93	0.72	3.04	60
502	1	37	155	91	79	1	1	1	0	2	1	0	0	6.1	10.22	3.44	1.77326	2	53	100.1	10.93	436.4	4.38	86.9	5.79	2.24	3.2	0.88	4.62	57
503	1	45	170	119	76	1	0	1	0	2	1	0	0	8.33	11.36	1.83	4.55191	2	88	230.9	16.68	363.6	6.31	77	7.14	1.42	1.86	1.1	3.36	55
504	1	36	148	103	99	1	0	1	0	2	1	0	0	5.26	8.61	2.76	1.9058	2	43	7.65	0.8	342.5	5.17	54	18.55	20.67	0.57	0.38	6.61	59
505	1	41	189	109	106	1	0	1	1	1	1	0	0	4.65	8.15	2.77	1.6787	2	59	26.03	2.9	357.6	5.03	64.9	5.6	2.95	5.39	0.94	6.86	60
506	1	40	153	82	108	0	0	1	0	2	1	0	0	10.34	13.03	2.01	5.14428	3	110	319.4	51.43	343.4	3.42	62	6.85	1.54	3.84	0.94	5.32	56
507	1	37	127	94	77	1	0	0	0	1	1	0	0	13.54	16.54	2.5	5.416	2	59	122.6	29.6	280.6	5.64	80.7	7.3	4.18	4.55	0.87	6.09	55
508	2	45	161	105	96	1	0	0	0	1	1	0	0	6.61	8.64	1.37	4.82482	3	108	719.4	61.37	258.3	5.74	68.9	5.7	3.4	3.51	0.63	4.74	55
509	1	38	168	100	72	1	0	0	1	1	2	1	1	15.06	17.5	1.68	8.96429	1	58	63.58	5.9	264.2	3.57	46.1	8.9	11.41	1.56	0.7	6.14	40
510	1	44	135	90	100	1	0	1	0	1	2	1	1	6.83	11.52	3.93	1.73791	1	52	18.9	1.78	574.9	5.04	81.9	10.7	1.48	2.77	0.89	3.95	38
511	1	26	111	82	91	1	1	0	0	1	1	0	0	7.28	9.23	1.27	5.73228	1	20	151.9	5.73	482.9	5.52	87.6	8.2	3.37	2.61	0.83	4.51	53
512	1	41	152	80	69	1	1	0	0	1	1	0	0	7.05	10.36	2.75	2.56364	1	80	30.41	1.39	420.8	5.46	60.7	7.87	1.75	2.47	1.09	3.84	59
513	1	44	187	117	64	0	0	0	0	2	1	0	0	5.95	7.85	1.32	4.50758	1	2	4.26	1.15	435.7	6.67	61.5	6.9	1.67	3.14	0.83	4.76	60
514	1	41	141	98	93	1	1	0	0	2	1	0	0	6.17	8.84	1.92	3.21354	1	48	890.7	67.7	417.5	3.48	61.9	5.65	4.13	2.99	0.93	5.01	53
515	1	41	123	75	65	1	0	0	0	3	1	0	0	3.73	5.24	1.17	3.18803	1	5	3	1.96	452.3	5.18	72	8.95	2.12	1.73	1.48	3.66	65
516	1	46	120	70	70	0	0	1	0	3	1	0	0	2.69	5.12	1.89	1.42328	2	16	4.66	0.72	339.5	4.85	79	4.97	1.33	2.72	1.33	4.11	58
517	1	43	126	94	87	1	0	1	0	3	1	0	0	5.27	8.38	2.41	2.18672	2	11	5.48	1.36	322.2	5.65	93.3	4.66	1.37	1.93	0.79	2.9	62
518	1	42	117	57	61	0	0	0	1	3	1	0	0	4.25	6.92	1.97	2.15736	2	4	4.13	1.37	548.2	4.74	80.9	6.2	1.7	2.69	1.16	4.06	66
519	1	43	167	121	73	0	0	1	0	3	1	0	0	2.16	3.66	1.24	1.74194	1	13	14.63	3.81	447.1	5.23	78.8	4.76	2.19	3.33	0.91	4.69	65
520	1	44	126	86	67	0	0	0	0	3	1	0	0	4.25	7.57	2.87	1.48084	2	7	3	0.7	408.8	1.91	60.6	6.39	2.04	2.55	0.69	4.06	59
